# Supplementary material
Source: Research Square preprint supplement (doi:10.21203/rs.3.rs-9213369/v1)
Supplement: Supplementary file 1 [file 017781b8af4e7cfb84574789.docx]

**Table 1. List of 19 *β*-globin gene mutations**

| **No.** | **Mutation (Common Name)** | **HGVS Nomenclature** | **Type/Region** |
| --- | --- | --- | --- |
| 1 | -28 (A>G) | *HBB: c.*-78*A>G* | Promoter |
| 2 | -29 (A>G) | *HBB: c.*-79*A>G* | Promoter |
| 3 | -30 (T>C) | *HBB: c.*-80*T>C* | Promoter |
| 4 | -32 (C>A) | *HBB: c.*-82*C>A* | Promoter |
| 5 | -50 (A>G) | *HBB: c.*-100*G>A* | Promoter |
| 6 | Codons 14/15 (+G) | *HBB: c.*45*\_*46*insG* | Frameshift |
| 7 | Codon 17 (A>T) | *HBB: c.*52*A>T* | Nonsense |
| 8 | Codon 26 (G>A) | *HBB: c.*79*G>A* | Missense (Hb E) |
| 9 | Codons 27/28 (+C) | *HBB: c.*84*\_*85*insC* | Frameshift |
| 10 | Codon 31 (-C) | *HBB: c.*94*delC* | Frameshift |
| 11 | Codon 37 (G>A) | *HBB: c.*113*G>A* | Missense |
| 12 | Codons 41/42 (-TTCT) | *HBB: c.*126*\_*129*delCTTT* | Frameshift |
| 13 | Codon 43 (G>T) | *HBB: c.*130*G>T* | Nonsense |
| 14 | Codons 71/72 (+A) | *HBB: c.*216*\_*217*insA* | Frameshift |
| 15 | IVS-I-1 (G>T) | *HBB: c.*92*+*1*G>T* | Splicing site |
| 16 | IVS-I-5 (G>C) | *HBB: c.*92*+*5*G>C* | Splicing site |
| 17 | IVS-II-654 (C>T) | *HBB: c.*316*-*197*C>T* | Intronic (Splicing) |
| 18 | CAP +1 (A>C) | *HBB: c.-*50*A>C* | 5' UTR |
| 19 | Initiation codon (T>G) | *HBB: c.*2*T>G* | Start Codon |

***Note****: HGVS, Human Genome Variation Society; RDB-PCR, reverse dot blot polymerase chain reaction; IVS, intervening sequence; CD, codon*

**Table 2. Genotype Distribution of 1672 Thalassemia Carriers**

| Genotype | **n** | **%** |
| --- | --- | --- |
| ***α-*Thalassemia (n = 1090)** |  |  |
| *Silent α-thalassemia* | 450 | 26.9 |
| *-α3.7/αα* | 281 | 16.8 |
| *-α4.2/αα* | 90 | 5.4 |
| *αCSα/αα* | 37 | 2.2 |
| *αWSα/αα* | 28 | 1.7 |
| *αQSα/αα* | 14 | 0.8 |
| *Minor α-thalassemia* | 609 | 36.4 |
| *--SEA/αα* | 594 | 35.5 |
| *-α3.7/-α3.7* | 8 | 0.5 |
| *--THAI/αα* | 2 | 0.1 |
| *-α3.7/-α4.2* | 1 | 0.1 |
| *-α3.7/αCSα* | 1 | 0.1 |
| *-α3.7/αQSα* | 1 | 0.1 |
| *-α3.7/αWSα* | 1 | 0.1 |
| *αCSα/αQSα* | 1 | 0.1 |
| *Hb H disease* | 31 | 1.9 |
| *-α3.7/--SEA* | 17 | 1.0 |
| *-α4.2/--SEA* | 6 | 0.4 |
| *--SEA/αCSα* | 6 | 0.4 |
| *--SEA/αWSα* | 2 | 0.1 |
| ***β-*Thalassemia (n = 522)** |  |  |
| *βCD41-42/βN* | 159 | 9.5 |
| *βIVS-Ⅱ-654/βN* | 151 | 9.0 |
| *βCD17/βN* | 82 | 4.9 |
| *β-28/βN* | 73 | 4.4 |
| *βE/βN* | 14 | 0.8 |
| *βCD71-72/βN* | 14 | 0.8 |
| *β27/28/βN* | 9 | 0.5 |
| *βCD43/βN* | 7 | 0.4 |
| *β-29/βN* | 5 | 0.3 |
| *β-50/βN* | 3 | 0.2 |
| *βIVS-I-1/βN* | 3 | 0.2 |
| *βCD14-15/βN* | 2 | 0.1 |
| ***αβ-*Compound** **Thalassemia (n=60)** |  |  |
| *--SEA/αα, βIVS-Ⅱ-654/βN* | 10 | 0.6 |
| *-α4.2/αα, βCD41-42/βN* | 7 | 0.4 |
| *-α3.7/αα, βCD41-42/βN* | 6 | 0.4 |
| *--SEA/αα, βCD17/βN* | 4 | 0.2 |
| *--SEA/αα, βCD41-42/βN* | 4 | 0.2 |
| *--SEA/αα, β-28/βN* | 3 | 0.2 |
| *-α3.7/αα, β-28/βN* | 3 | 0.2 |
| *-α3.7/αα, βIVS-Ⅱ-654/βN* | 3 | 0.2 |
| *--SEA/αα, βCD14-15/βN* | 2 | 0.1 |
| *--SEA/αα, β27/28/βN* | 2 | 0.1 |
| *--SEA/αα, βCD41-42/β-50* | 2 | 0.1 |
| *αCSα/αα, βCD41-42/βN* | 1 | 0.1 |
| *αCSα/αα, βCD71-72/βN* | 1 | 0.1 |
| *αWSα/αα, β-28/βN* | 1 | 0.1 |
| *αWSα/αα, βCD41-42/βN* | 1 | 0.1 |
| *αWSα/αα, βCD17/βN* | 1 | 0.1 |
| *-α3.7/αα, βCD71-72/βN* | 1 | 0.1 |
| *-α3.7/αα, βE/βN* | 1 | 0.1 |
| *-α4.2/αα, βCD17/βN* | 1 | 0.1 |
| *-α4.2/αα, βCD71-72/βN* | 1 | 0.1 |
| *-α4.2/αα, βcap/βN* | 1 | 0.1 |
| *-α3.7/-α3.7, βCD41-42/βN* | 1 | 0.1 |
| *-α3.7/-α4.2, βCD41-42/βN* | 1 | 0.1 |
| *-α4.2/--SEA, βCD41-42/βN* | 1 | 0.1 |
| *-α4.2/--SEA, βCD71-72/βN* | 1 | 0.1 |
| **Total** | **1672** | **100.0** |
