# Supplementary material
Source: Research Square preprint supplement (doi:10.21203/rs.3.rs-9213369/v1)
Supplement: Supplementary file 2 [file 1293cd71f531a03323f26e41.docx]

import matplotlib.pyplot as plt
import pandas as pd
import numpy as np
import seaborn as sns

# Set SCI Style (Blood style: Clean, high contrast, sans-serif)
plt.rcParams['font.family'] = 'sans-serif'
plt.rcParams['font.sans-serif'] = ['Arial', 'Helvetica']
plt.rcParams['axes.linewidth'] = 1.2
plt.rcParams['axes.labelweight'] = 'bold'
plt.rcParams['axes.titlesize'] = 14
plt.rcParams['axes.labelsize'] = 12
plt.rcParams['xtick.labelsize'] = 10
plt.rcParams['ytick.labelsize'] = 10
plt.rcParams['mathtext.fontset'] = 'stix'

# --- DATA EXTRACTION ---

# Table 1: Alpha-Thalassemia (n=1090)
alpha_phenotypes = ['Minor type', 'Silent type', 'Hb H disease']
alpha_pheno_counts = [609, 450, 31]
alpha_pheno_colors = ['#2878B5', '#9AC9DB', '#C82423']

# Detailed genotypes for Alpha (Major ones)
alpha_genotypes = {
 r'$--^{SEA}/\alpha\alpha$': 594,
 r'$-\alpha^{3.7}/\alpha\alpha$': 281,
 r'$-\alpha^{4.2}/\alpha\alpha$': 90,
 r'$\alpha^{CS}\alpha/\alpha\alpha$': 37,
 r'$\alpha^{WS}\alpha/\alpha\alpha$': 28,
 r'$-\alpha^{3.7}/--^{SEA}$': 17,
 r'$\alpha^{QS}\alpha/\alpha\alpha$': 14,
 'Others': 29
}
df_alpha_gen = pd.DataFrame(list(alpha_genotypes.items()), columns=['Genotype', 'n']).sort_values('n', ascending=True)

# Table 2: Beta-Thalassemia (n=522)
beta_data = {
 'Genotype': [r'$\beta^{CD41-42}/\beta^N$', r'$\beta^{IVS-II-654}/\beta^N$', r'$\beta^{CD17}/\beta^N$',
 r'$\beta^{-28}/\beta^N$', r'$\beta^{E}/\beta^N$', r'$\beta^{CD71-72}/\beta^N$',
 r'$\beta^{27/28}/\beta^N$', r'$\beta^{CD43}/\beta^N$', r'$\beta^{-29}/\beta^N$',
 r'$\beta^{-50}/\beta^N$', r'$\beta^{IVS-I-1}/\beta^N$', r'$\beta^{CD14-15}/\beta^N$'],
 'n': [159, 151, 82, 73, 14, 14, 9, 7, 5, 3, 3, 2]
}
df_beta = pd.DataFrame(beta_data).sort_values('n', ascending=True)

# Table 3: Compound Thalassemia (n=60)
comp_data = {
 'Combination': [
 r'$--^{SEA}/\alpha\alpha, \beta^{IVS-II-654}/\beta^N$',
 r'$-\alpha^{4.2}/\alpha\alpha, \beta^{CD41-42}/\beta^N$',
 r'$-\alpha^{3.7}/\alpha\alpha, \beta^{CD41-42}/\beta^N$',
 r'$--^{SEA}/\alpha\alpha, \beta^{CD17}/\beta^N$',
 r'$--^{SEA}/\alpha\alpha, \beta^{CD41-42}/\beta^N$',
 r'$--^{SEA}/\alpha\alpha, \beta^{-28}/\beta^N$',
 r'$-\alpha^{3.7}/\alpha\alpha, \beta^{-28}/\beta^N$',
 r'$-\alpha^{3.7}/\alpha\alpha, \beta^{IVS-II-654}/\beta^N$',
 'Others'
 ],
 'n': [10, 7, 6, 4, 4, 3, 3, 3, 20]
}
df_comp = pd.DataFrame(comp_data).sort_values('n', ascending=True)

# --- PLOTTING ---
fig = plt.figure(figsize=(16, 14))
gs = fig.add_gridspec(2, 2, hspace=0.3, wspace=0.4)

# Panel A: Alpha Thalassemia Summary (Phenotype Pie + Major Genotypes Bar)
ax_a1 = fig.add_subplot(gs[0, 0])
# Using a grouped bar for major alpha genotypes
bars_a = ax_a1.barh(df_alpha_gen['Genotype'], df_alpha_gen['n'], color='#2878B5', alpha=0.8, edgecolor='black', linewidth=0.8)
ax_a1.set_title('A. $\\alpha$-Thalassemia Genotype Distribution (n=1,090)', loc='left', pad=15, weight='bold')
ax_a1.set_xlabel('Number of Cases (n)')
for bar in bars_a:
 width = bar.get_width()
 ax_a1.text(width + 5, bar.get_y() + bar.get_height()/2, f'{int(width)}', va='center', size=10)
ax_a1.set_xlim(0, 680)

# Inset Pie for Phenotypes
ax_inset = ax_a1.inset_axes([0.6, 0.1, 0.35, 0.35])
ax_inset.pie(alpha_pheno_counts, labels=['Minor', 'Silent', 'HbH'], colors=alpha_pheno_colors,
 autopct='%1.0f%%', textprops={'size': 8, 'weight': 'bold'}, startangle=140,
 wedgeprops={'edgecolor': 'white', 'linewidth': 0.5})
ax_inset.set_title('Clinical Phenotypes', size=9, weight='bold')

# Panel B: Beta Thalassemia Spectrum
ax_b = fig.add_subplot(gs[0, 1])
bars_b = ax_b.barh(df_beta['Genotype'], df_beta['n'], color='#5D94BB', alpha=0.8, edgecolor='black', linewidth=0.8)
ax_b.set_title('B. $\\beta$-Thalassemia Mutation Spectrum (n=522)', loc='left', pad=15, weight='bold')
ax_b.set_xlabel('Number of Cases (n)')
for bar in bars_b:
 width = bar.get_width()
 ax_b.text(width + 3, bar.get_y() + bar.get_height()/2, f'{int(width)} ({(width/522)*100:.1f}%)', va='center', size=10)
ax_b.set_xlim(0, 200)

# Panel C: Alpha-Beta Compound Landscape
ax_c = fig.add_subplot(gs[1, :])
bars_c = ax_c.barh(df_comp['Combination'], df_comp['n'], color='#E67E22', alpha=0.8, edgecolor='black', linewidth=0.8)
ax_c.set_title('C. $\\alpha\\beta$-Compound Thalassemia Genotypes (n=60)', loc='left', pad=15, weight='bold')
ax_c.set_xlabel('Number of Cases (n)')
for bar in bars_c:
 width = bar.get_width()
 ax_c.text(width + 0.5, bar.get_y() + bar.get_height()/2, f'{int(width)} ({(width/60)*100:.1f}%)', va='center', size=10)
ax_c.set_xlim(0, 25)

# General Cleanup
for ax in [ax_a1, ax_b, ax_c]:
 ax.spines['top'].set_visible(False)
 ax.spines['right'].set_visible(False)
 ax.grid(axis='x', linestyle='--', alpha=0.4)

plt.tight_layout()
plt.savefig('Fused_Thalassemia_Blood_Standard.png', dpi=300, bbox_inches='tight')
plt.show()
