# Supplementary material
Source: Research Square preprint supplement (doi:10.21203/rs.3.rs-9213369/v1)
Supplement: Supplementary file 3 [file b79a4e9a4d566b1a2fad5333.xlsx]

## Sheet: Sheet1
编号	门诊号	年龄	缺失A地贫	突变A地贫	突变B地贫	HB	MCV	MCH	HBA	HBA2
1	6640460	26岁			654-2/N	91	62.6	19.8	92.71	5.28
2	5919987	31岁	--SEA/αα			102	71.3	21.4	97.59	2.41
3	5308649	28岁				158	86.5	30.9	97.12	2.88
4	5920191	31岁				143.8	89.9	30.4	96.88	3.12
5	4638435	28岁				127	90.9	32	95.6	3.1
6	6237645	30岁				149	89.8	29.3	97.4	2.6
7	3816073	32岁				154	85.7	28.9	96.85	3.15
8	6786066	35岁	--SEA/αα			135	75.7	23.3	97.67	2.33
9	216356	33岁				122	88.5	29.2	97.28	2.72
10	1509671	29岁				148	85.3	29.8	97.06	2.94
11	4454202	28岁				131	89.4	30.3	95.96	4.04
12	4173762	29岁	--SEA/αα			113	67.2	22.1	97.58	2.42
13	6695742	37岁				93.4	73.7	24.3	97.56	2.44
14	4108677	28岁			41-42/N	96	59.2	19.2	94.62	5.38
15	6565092	26岁				125	91.5	31.2	97.34	2.66
16	5441920	30岁				123	81.9	27.8	97.11	2.89
17	3410667	31岁				89	74.3	22.9	97.7	2.3
18	6756487	24岁				172	88.3	30.9	97.11	2.89
19	4108677	28岁			41-42/N	96	59.2	19.2	94.62	5.38
20	6796609	36岁				142	90.9	31.4	97.13	2.87
21	4081587	31岁	--SEA/αα			111	68.3	21.7	97.46	2.54
22	379561	30岁				92	64.9	18.9	97.91	2.09
23	4882372	27岁				105	82.7	28.9	93.99	6.01
24	5462708	29岁				154	83.3	28.2	96.88	3.12
25	4581744	35岁				146	92.1	30.3	96.86	3.14
26	4934071	30岁			654-2/N	110	64.8	20.5	92.2	5.1
27	0294987	31岁				112	92.7	29.4	97.55	2.45
28	6659995	30岁	--SEA/αα			132	68.3	19.8	97.51	2.49
29	6691928	35岁				166.6	90	31	96.99	3.01
30	6696259	25岁				119	91	31.6	93.6	2.7
31	2397340	29岁	-3.7α/αα			127	80.2	25.9	97.34	2.66
32	6732607	29岁			41-42/N	94.1	62.6	20.1	94.31	5.69
33	3032925	31岁				147	91.3	31.3	97.58	2.42
34	5351979	35岁				116	89.1	29.4	97.12	2.88
35	5462708	29岁				154	83.3	28.2	96.88	3.12
36	4581744	35岁				146	92.1	30.3	96.86	3.14
37	4934071	30岁			654-2/N	110	64.8	20.5	92.2	5.1
38	0294987	31岁				112	92.7	29.4	97.55	2.45
39	6659995	30岁	--SEA/αα			132	68.3	19.8	97.51	2.49
40	6691928	35岁				166.6	90	31	96.99	3.01
41	6696259	25岁				119	91	31.6	93.6	2.7
42	2397340	29岁	-3.7α/αα			127	80.2	25.9	97.34	2.66
43	6732607	29岁			41-42/N	94.1	62.6	20.1	94.31	5.69
44	3032925	31岁				147	91.3	31.3	97.58	2.42
45	5351979	35岁				116	89.1	29.4	97.12	2.88
46	6356815	20岁	--SEA/αα			111.4	70.1	23	97.6	2.4
47	4350877	26岁	-3.7α/αα			124	83.4	26.4	97.47	2.53
48	3937561	30岁				119.6	86.1	29.8	95.7	2.8
49	6658142	24岁			41-42/N	108.7	61.2	20.3	94.13	5.87
50	6675661	25岁	--SEA/αα			122.5	65.2	21.8	97.57	2.43
51	4111003	26岁				131	93.2	30.7	97.32	1.25
52	4386249	29岁				137	89.8	29.7	96.82	3.18
53	4523096	31岁				120	93.2	31.4	92.35	5.8
54	6644510	25岁				123.4	92.1	30.5	94.13	3.04
55	6200063	34岁				149	92.8	29.9	97.26	2.74
56	6078341	25岁				111.5	79.9	28	97.46	2.54
57	6719481	24岁				118.3	91.7	31.5	96.95	3.05
58	4311783	22岁				123	95.6	31.9	97.03	2.97
59	4952370	26岁				111.8	83.9	28.6	95.7	2.5
60	6643899	26岁	--SEA/αα			145	67.5	20.5	97.61	2.39
61	6796359	27岁	--SEA/αα			132	71.2	21.4	97.53	2.47
62	6763604	25岁				119	91.7	31.9	97.28	2.72
63	6815009	32岁				173	89.4	32.8	93.66	3.44
64	5884739	36岁				111	75.7	22.3	97.63	2.37
65	6653008	28岁			17/N	108.3	64.1	21	89.03	5.04
66	6841777	31岁				153	90	30.6	97.02	2.98
67	6425369	29岁				159	89.6	30.5	97.52	2.48
68	6852658	26岁	--SEA/αα			127	67.8	21.3	97.62	2.38
69	6837519	25岁	-3.7α/αα			150.5	81.9	27.4	97.53	2.47
70	2387977	27岁	--SEA/αα			113	66.1	20.6	97.07	2.93
71	6624153	28岁	-3.7α/αα			112	83.9	28.2	90.8	2.2
72	6640083	28岁				133	76.4	25.7	97.19	2.81
73	6842088	24岁				126.4	89.8	30.1	97.15	2.85
74	4391601	26岁				137	87.5	30.5	96.06	1.77
75	487023	44岁				87	77.5	22.5	97.8	2.2
76	3903932	27岁	--SEA/αα			137	63.8	20.9	97.3	2.7
77	3945869	26岁				115	89.4	30.4	92	2.5
78	6194030	26岁				102	71.5	21.7	97.7	2.3
79	892413	38岁			41-42/N	120	64	20.9	93.2	5.3
80	6425228	26岁				119	72.1	23.1	97.46	2.54
81	6673764	22岁	-3.7α/αα			125.5	79.1	27.1	97.04	2.96
82	2035131	33岁	--SEA/αα			103	66.2	21.6	97.44	2.56
83	5514790	36岁				128	86.7	29.8	46.3	2.5
84	6871157	34岁				160	85.8	29.4	97.07	2.93
85	6630649	36岁				160	88.1	30.7	96.64	3.36
86	6856267	27岁				155	87.6	29.1	97.47	1.47
87	6666675	23岁				142	82.2	26.8	93.49	3.33
88	6856091	29岁	--SEA/αα			124	65.5	21.2	97.36	2.64
89	6830903	36岁				156	89.8	30.1	97.39	2.61
90	4903863	35岁	--SEA/αα			103	63.9	17.5	97.74	2.26
91	3215085	29岁				98	70.4	21.8	97.7	2.3
92	630187	36岁				129	86.7	29	80.6	1.8
93	6160039	26岁				121	97.8	33.2	96.14	2.43
94	6776994	25岁				162.9	88.6	30.5	96.6	3.4
95	5674663	32岁				113.3	87.2	29.6	97.16	2.84
96	6378012	35岁	--SEA/αα			99	69.1	21.2	97.8	2.2
97	6866248	30岁				156.9	87.7	30	96.97	3.03
98	6046675	23岁	-3.7α/αα			129	74.7	24.9	97.26	2.74
99	6369228	24岁				178	93.1	32.1	96.68	3.32
100	6265121	31岁	--SEA/αα			137	63	20.1	97.9	2.1
101	1219106	29岁				110	88.1	29.1	95.29	2.35
102	6713650	25岁				115	70.5	21.1	98.1	1.9
103	388567	29岁			654-2/N	114	63.3	20.3	94.7	5
104	6646473	22岁				121	89.3	30.7	97.35	2.65
105	5018338	37岁	--SEA/αα			99.2	64.3	21.2	97.33	2.67
106	6779704	36岁				110.3	85.2	30.1	97.5	2.5
107	6833966	21岁				84	68.4	19.8	98.1	1.9
108	6851684	39岁	--SEA/-α3.7	无扩增产物		90	57	16.7	97.8	2
109	6233322	25岁	--SEA/αα			146	61.6	19.4	97.7	2.3
110	487291	36岁				82	81	25.1	97.8	2.2
111	6823316	33岁				144	81.1	26.9	97.13	2.87
112	5098928	28岁				121	79.2	26.2	77.2	1.82
113	4884566	31岁				150	91.9	30.4	95.35	2.62
114	6686850	29岁				172	86.1	32.8	97.12	2.88
115	6686821	27岁				107	78.7	26.8	97.61	2.39
116	6719432	30岁			41-42/N	104	59.6	19.2	94.43	5.57
117	6354865	36岁			17/N	119	61.5	19.2	94.06	5.94
118	6816329	24岁				149.6	86.5	30.3	97.5	2.5
119	6710994	22岁	--SEA/αα			114.8	66.6	22.1	97.64	2.36
120	6267482	29岁				148	88.1	30	96.7	1.45
121	6046268	22岁				161.7	85.4	30.1	97.28	2.72
122	4356446	36岁	--SEA/αα			116	64.4	19.9	97.04	2.96
123	5529942	29岁				118	93.7	30.9	94.26	1.57
124	4228540	29岁				131.2	83.8	29.7	98.62	1.38
125	4454698	28岁	--SEA/αα			137	67	20.3	97.53	2.47
126	4506545	29岁				130	84.7	28.3	97.27	2.73
127	6406567	25岁				94	70.8	19.2	98.1	1.9
128	6269333	23岁				112	75.9	24.1	97.8	2.2
129	5636020	28岁	--SEA/αα			126	67	20.9	97.4	2.6
130	5617486	25				135	94.4	32.7	97.11	2.89
131	4985166	28				159	80.2	28.6	96.93	3.07
132	4420226	27	--SEA/αα			116	64.3	20.4	97.66	2.34
133	6032403	27				124	84.2	28.1	97.06	2.94
134	6462747	27	--SEA/αα			121	64.7	20.2	97.71	2.29
135	3956567	26	-3.7α/αα			138	84.2	26.6	97.12	2.88
136	4217001	28	--SEA/αα			103.4	68.9	22.8	97.29	2.71
137	5679742	25				120	96.3	31.7	96.9	3.1
138	5355957	25	-3.7α/αα			144	82.7	26.8	97.07	2.93
139	4651273	24	-3.7α/αα			116	83.6	29.2	97.29	2.71
140	3617941	36				130	91.3	30.7	97.53	2.47
141	3869374	36	--SEA/αα			135.1	68.1	21.4	97.82	2.18
142	4714786	35				124.3	85.6	30.2	98.9	1.1
143	4524495	23	-4.2α/αα			114.5	74.9	25.8	97.51	2.49
144	6452945	31			-28/N	107	70.9	22.8	89.45	5.42
145	6885413	33				144	90.4	30.1	96.98	3.02
146	2787905	35				140	77.6	26.3	97.6	2.4
147	6887507	23	--SEA/-α4.2	无扩增产物		92	59.8	17.8	98.9	1.1
148	6847687	31岁				171.5	84.8	28.3	97.03	2.97
149	6431817	29岁	-3.7α/αα			129.7	78.6	26.6	97.49	2.51
150	6824490	29岁				141.9	78	26.5	97.18	2.82
151	2414779	32岁				144	85	29.5	97.1	2.9
152	4186593	35岁				129.4	89.2	31.4	97.06	2.94
153	4018258	39岁				153	87.9	29	97	3
154	1489397	37岁				111	93.9	32.4	97.51	2.49
155	467471	38岁				129	88.2	28.7	96.94	3.06
156	6816702	28岁	--SEA/αα			146	68.7	22.3	97.22	2.78
157	6438278	26岁	-3.7α/αα			104	91	29.3	97.57	2.43
158	6772670	31岁				165	86.5	29.4	96.94	3.06
159	4499114	28岁				132	88.7	28.6	97.55	2.45
160	6889343	27岁			41-42/N	131	57.6	18.9	94.62	5.38
161	490509	24岁	--SEA/αα			68	64.3	20.2	97.68	2.32
162	4111132	35岁				109	100.9	32.9	94	3.11
163	4282085	39岁				106	70	21.3	97.47	2.53
164	5572193	25岁	-3.7α/αα			119	81.3	26.7	97.45	2.55
165	3662264	31岁				83	67.7	19.4	98	2
166	6708555	35岁				139	87.8	28.8	97.17	2.83
167	4364083	31岁			-28/N	107	71.6	22.9	94.54	5.46
168	4851239	27岁	--SEA/αα			104.1	70	22.4	97.56	2.44
169	6080597	28岁				123	80.5	25.3	97.24	2.76
170	5555472	28岁				119	84.6	29.2	97.51	2.49
171	6861332	28岁	-3.7α/αα			149	86.4	27.7	97.4	2.6
172	6924684	33岁				149	92.4	32.3	92.32	2.94
173	6831159	40岁			41-42/N	110	61.3	19.1	93.94	6.06
174	4019393	32岁				103	74.2	22	97.52	2.48
175	6487328	33岁	-3.7α/αα			107	80.4	25.3	96.88	3.12
176	3818740	30岁				120	95.1	30.8	92.56	2.71
177	4963022	33岁	--SEA/αα			91	60.1	18.9	97.42	2.58
178	5672489	22岁	-3.7α/-3.7α	无扩增产物		130	70.5	22.4	97.73	2.27
179	6537071	20岁	-3.7α/αα			105	93.3	29.4	97.51	2.49
180	6698312	37岁				117	74.9	23.3	97.63	2.37
181	6831771	26岁			41-42/N	92.8	60.8	19.5	92.45	5.73
182	6847292	28岁				109	92	30	97.59	2.41
183	6887235	24岁	-3.7α/αα			117	81	26.5	97.58	2.42
184	6826303	27岁	--SEA/αα			106	65.8	21.3	97.59	2.41
185	3531044	28岁			654-2/N	107	58.7	19	92.04	5.49
186	6870155	32岁	--SEA/αα			117	72.6	22.5	97.5	2.5
187	197184	27岁			654-2/N	105	65.2	21.4	91.51	5.29
188	3912909	30岁				125	88.8	28.7	97.51	2.49
189	5233730	29岁				132	91	29.7	97.67	2.33
190	6951394	42岁	--SEA/αα			137	64.5	20.3	97.64	2.36
191	6447232	37岁				120	92.1	31.4	96.95	3.05
192	6167757	26岁			17/N	106	62.3	20.1	94.58	5.42
193	712006	31岁				153	91.5	30.8	97.4	2.6
194	311898	31岁				107	68.7	22	97.35	2.65
195	5312217	30岁				133	88.5	31.1	97.12	2.88
196	3484751	31岁				120.6	90.6	31	97.38	2.62
197	6444259	29岁		αCSα/αα		104	85.8	27.4	98.08	1.92
198	6444266	30岁				140.3	89.2	30.3	97.22	2.78
199	4336873	32岁			14-15/N	100	60.5	18.8	94.33	5.67
200	6943332	30岁				124	83.4	28.2	96.87	3.13
201	6879007	28岁			654-2/N	91	61.9	20.3	94.75	5.25
202	6639817	32岁				141	79.5	25.8	97.17	2.83
203	1563439	38岁	-3.7α/αα			115	80	25.2	97.66	2.34
204	6750970	32岁				122	92.3	31.2	97.35	2.65
205	6930029	24岁	--SEA/αα			117.1	68	22.1	97.4	2.6
206	492487	40岁				93	70	19.9	97.87	2.13
207	5049036	33岁				107.4	76.8	26	97.36	2.64
208	1496244	33岁				145.7	86.6	29.2	33.41	2.55
209	1713059	30岁	--SEA/αα			105	73.2	22.7	97.53	2.47
210	6235223	29岁				113.2	87.1	28.7	97.54	2.46
211	4331433	32岁	--SEA/αα			143	64.9	20.5	97.13	2.87
212	5360000	42岁		αWSα/αα		83	68.8	20.4	97.57	2.43
213	2114217	44岁				158.5	87.4	30.4	91.94	2.28
214	6790506	21岁				136	89.2	30	39.42	2.9
215	5124877	28岁				124	93.3	31.9	34.71	1.88
216	5468694	43岁				138	88.5	28.2	97.25	2.75
217	6919055	25岁				161	90.2	29.8	97.04	2.96
218	3730739	32岁				103	80.3	25.4	97.29	2.71
219	310364	33岁				159	92.4	32	97.41	2.59
220	4677193	26岁				116	92.1	31.7	93.9	2.8
221	3072323	25岁				140.1	90.4	30.9	97.54	2.46
222	6932935	27岁				159	87.1	30.2	96.92	3.08
223	6370427	26岁				124.7	91.2	31.1	96.74	3.26
224	3012522	31岁				80	111.5	38.5	91.64	2
225	6975025	34岁				147	83.6	28.1	97.07	2.93
226	6845914	26岁				123	87.2	27.6	97.73	2.27
227	6955942	31岁				123	88.4	29.1	97.72	2.28
228	7012144	28岁				157	89.2	29.8	96.98	3.02
229	6999658	33岁	-4.2α/αα			138	80.7	26.4	73.6	1.62
230	6965077	28岁				73	70.6	20.6	97.69	2.31
231	411763	29岁	-3.7α/αα			121	84.1	27.1	98.37	1.63
232	6888030	26岁				147	88.6	31.1	97.24	2.76
233	6771723	26岁				134.3	85.6	31.2	97.04	2.96
234	337508	32岁	--SEA/αα			126	67.2	31.1	97.29	2.71
235	6955373	32岁				148	78.5	27	96.49	3.51
236	6937164	33岁				114.6	91.5	32.1	96.87	3.13
237	5167508	35岁	-3.7α/αα			127	80.9	26.6	97.35	2.65
238	5289728	26岁			-28/N	145	75.7	23.8	90	5.68
239	493325	41岁				69	63.9	17	98.37	1.63
240	5634289	23岁				103	88.3	29.4	97.58	2.42
241	6648867	28岁				96.5	74	24.3	97.6	2.4
242	2078100	36岁	-3.7α/αα	αCSα/αα		140	76.1	23.3	98.22	1.78
243	3871503	23岁				120.1	84.3	28.8	96.44	3.56
244	6888247	25岁				169	85	28.8	97.09	2.91
245	1983206	32岁				153	85.2	28.8	96.93	3.07
246	5383230	34岁				123.8	88.5	29.9	96.61	3.39
247	1778257	30岁	-3.7α/αα			131	84	27.5	97.57	2.43
248	1578525	28岁				132	86.1	30.5	97.5	1.45
249	7041524	37岁	-3.7α/αα			135	85	27.7	97.11	2.89
250	1327799	36岁				115	83	27.5	97.55	2.45
251	6583451	32岁	--SEA/αα			105.8	64.3	21	97.57	2.43
252	6145484	35岁				127	90.3	30	96.66	3.34
253	6942791	27岁				154	92.2	30.6	96.74	3.26
254	4815576	32岁				117	73.9	23.4	97.5	2.5
255	7043896	40岁				153	84.3	28.7	97.01	2.99
256	3410383	30岁				108	91.5	30.4	97.05	2.95
257	4577864	29岁				116	63.8	20.8	88.82	7.7
258	5405131	29岁				143.2	93.1	31.6	97.39	2.61
259	7007074	31岁			41-42/N	143	60.9	18.8	93.86	6.14
260	6910233	24岁				119	88.4	30.1	97.64	2.36
261	4806141	36岁	--SEA/αα			128	68.7	21.8	97.33	2.67
262	2068041	39岁				123	72.6	22.7	97.49	2.51
263	5731783	26岁	--SEA/αα			140.4	72.8	22.6	96.53	2.05
264	766527	28岁				123	91.4	28.7	97.84	2.16
265	494197	38岁	--SEA/-α3.7	无扩增产物		104	71.2	19.8	88.71	1.54
266	6176017	27岁				127.3	96.6	33.8	96.43	3.57
267	6929804	29岁			41-42/N	107.6	60.5	19.3	94.49	5.51
268	5561347	30岁			41-42/N	113	60.8	19.3	92.06	5.44
269	7005290	30岁				95.7	82.4	26.8	97.81	2.19
270	6626103	29岁				128	88.2	31.4	97.62	2.38
271	3859897	29岁				164	85.6	29.8	97.3	2.7
272	95655	32岁				114	90.4	29.7	97.15	2.85
273	6703159	31岁	--SEA/-α3.7	无扩增产物		138	68.1	21	97.45	2.55
274	4498634	31岁	--SEA/αα			115	70.7	22.5	97.55	2.45
275	6885486	26岁				133.4	92.2	31.9	97	3
276	7036758	28岁	--SEA/αα			147	66.3	20.5	97.63	2.37
277	7033512	24岁			17/N	87	61.6	19.9	94.05	5.95
278	6935786	30岁				107.1	72.6	24.1	97.63	2.37
279	5235898	28岁				124.8	89.9	31.3	97.82	2.18
280	101878	44岁				147.1	92.3	30.9	97.25	2.75
281	7076247	31岁				111.3	94.6	32	97.13	2.87
282	7079086	28岁			17/N	115	65.3	21.1	92.22	5.49
283	7079080	27岁			654-2/N	128	64.7	19.6	94.31	5.69
284	7077137	30岁				160	92.3	30.9	97.57	2.43
285	7076554	38岁	--SEA/αα			142	70.1	21.6	97.39	2.61
286	3742071	27岁	-3.7α/αα			122	78.6	25.2	87.14	5.08
287	471349	43岁			654-2/N	77	71.4	24.2	93.11	4.48
288	7073457	34岁			654-2/N	122	64.8	20.2	94.64	5.36
289	507230	60岁	--SEA/-α3.7	无扩增产物		78	51.6	15.2	98.05	1.95
290	4435776	35岁				89	76.6	22.2	97.8	2.2
291	6982244	34岁				108	71.3	21.8	97.59	2.41
292	997234	34岁				135.8	87.5	30.5	96.4	3.6
293	6655852	29岁	-3.7α/αα			90	98.3	30.4	97.6	2.4
294	1319419	25岁				134	90	29.8	97.07	2.93
295	4406270	33				135	90.8	31.1	96.86	3.14
296	4087735	37岁				173.5	79.1	27.8	97.55	2.45
297	4393063	38岁				145.1	80.3	27.5	97.08	2.92
298	6989690	22岁	--SEA/αα			93.7	66.8	21.4	97.53	2.47
299	6853538	30岁				126	95.6	32.9	97.62	2.38
300	5829202	35岁				109	100.9	33.4	94.37	2.61
301	5346325	23岁	--SEA/αα			95	66.5	21.6	97.46	2.54
302	6964441	29岁	-3.7α/αα			119	85.4	27.1	97.55	2.45
303	7023303	34岁	-3.7α/αα			145	82.1	27.1	97.1	2.9
304	3637147	30岁				114.8	85.1	29.3	93.79	2.94
305	6936200	29岁	--SEA/αα			136.7	66.8	21.6	97.59	2.41
306	7009787	27岁			17/N	86	61.6	20.1	94.24	5.76
307	6322676	23岁		αCSα/αα		144	74.9	24.7	98.01	1.99
308	5518960	30岁				141.2	86.4	28.6	46.2	2.6
309	5518223	30岁				132.2	87.2	28.6	97.6	2.4
310	6428765	25岁				127	88.2	28.9	97.55	2.45
311	3944647	31岁	--SEA/αα			109	67.1	22.1	97.49	2.51
312	4822380	31岁				125	92.3	29.3	97.55	2.45
313	497027	27岁				100	74.2	21.7	97.69	2.31
314	943490	32岁				159	88	30.7	96.62	3.38
315	5123992	27岁				132	84.2	27.7	96.44	3.56
316	2891493	32岁	-3.7α/αα			103.8	77.7	25.5	97.31	2.69
317	6916114	28岁			71-72/N	103	70.8	22	92.26	5.13
318	3838902	30岁				125.9	88.9	31.1	92.97	2.6
319	3505252	33岁				125	89	29.8	94.67	2.75
320	4358308	37岁				128	85.1	29.4	97.51	2.49
321	7022248	34岁				136	78	23.6	97.62	2.38
322	7060941	41岁			41-42/N	120.1	58.1	18.6	94.15	5.85
323	6926247	32岁				112	87.4	29.4	96.95	3.05
324	7080482	25岁	--SEA/αα			115.7	66.9	22.1	97.45	2.55
325	7017592	27岁				96.4	71.7	23.4	97.53	2.47
326	6287247	28岁	-3.7α/αα			132	80.3	27.3	74.76	1.36
327	5450365	32岁	-3.7α/αα			116	80.4	26.5	97.69	2.31
328	5967908	29岁				116	95.2	32.6	97.27	2.73
329	424478	35岁			-29/N	92	61.8	17.6	95.12	4.88
330	496846	23岁				78	104.4	34.1	97.36	2.64
331	497581	32岁			654-2/N	142	59.7	18.7	94.03	5.97
332	6889937	24岁				111	88.5	29.1	96.42	3.58
333	4823882	29岁	-α3.7/-4.2α	无扩增产物	41-42/N	116	71.1	23.4	94.41	5.59
334	6393386	28岁				114	83.6	27.1	97.35	2.65
335	6535957	23岁				119.3	78.5	26.1	97.42	2.58
336	3704153	35岁				164	86.1	30	96.97	3.03
337	1152904	31岁				90	73.3	21.3	97.45	2.55
338	6737473	37岁				146	89.4	30.3	97.09	2.91
339	4766027	28岁				125	92.9	31.5	97.63	2.37
340	6969038	24岁			41-42/N	96	63.1	19.7	94.37	5.63
341	7069915	29岁	-3.7α/αα			116	82.4	26.8	97.61	2.39
342	6645143	27岁				142	88.3	30.1	97.36	2.64
343	4749176	29岁			654-2/N	100	64.6	20.4	94.6	5.4
344	7090368	30岁				142	84.1	29	96.63	3.37
345	6478573	30岁			654-2/N	91.5	58.8	19	95.17	4.83
346	2905189	29岁				117	97.2	33	97.94	2.06
347	7070490	27岁	--SEA/αα			118.5	68.3	21.8	97.44	2.56
348	7061002	24岁				154	89.3	29.8	96.79	3.21
349	4100270	23岁				118.2	92.8	32.2	93.91	2.63
350	4903663	25岁				117.2	82.8	27.6	97.89	2.11
351	6713923	27岁				119	97.5	32.9	97.35	2.65
352	7133638	36岁				146	84.6	28.5	97.14	2.86
353	6928304	31岁			654-2/N	96	69.6	21.4	91	5.19
354	7063787	25岁				106	77.1	24.5	97.68	2.32
355	4098180	27岁				112.5	78.8	26.7	97.17	2.83
356	3645234	40岁	--SEA/αα		654-2/N	100.8	72.9	23.2	94.65	5.35
357	6557910	43岁				151.2	88.9	30.6	96.77	3.23
358	191755	34岁	--SEA/αα			112	69	21.5	97.73	2.27
359	290130	52岁		αCSα/αα	41-42/N	104	67.5	21.1	94.49	5.51
360	53121	53岁			17/N	101	61.1	18.6	94.33	5.67
361	6361140	35岁				105	94.1	31	96.21	3.79
362	7080196	27岁				152.4	87	29.5	96.99	3.01
363	6880065	23岁	--SEA/αα			92.5	67	21.4	97.44	2.56
364	7127508	30岁			-28/N	103.9	71	22.5	91.79	5.6
365	4466247	32岁				109	79	24.8	97.46	2.54
366	1185158	33岁			41-42/N	94	63.4	19.9	92.37	5.44
367	7120412	29岁	--SEA/αα			101.3	65.4	21.2	97.54	2.46
368	7097947	30岁		αWSα/αα		131	80.2	25.9	97.35	2.65
369	5429182	36岁				114	91.5	31.4	97.6	2.4
370	4553178	30岁				103.4	75.6	25.1	97.13	2.87
371	6620334	26岁				127.8	89.5	30.5	97.36	2.64
372	6868487	32岁	-3.7α/αα		-28/N	138	69.3	22.8	93.64	6.36
373	6965976	26岁				132.5	82.6	28.1	88.07	2.2
374	7137643	41岁				144	90.3	29.8	97.37	2.63
375	7139804	37岁				161	84.3	29.3	97.45	2.55
376	4571885	26岁			41-42/N	90.8	55.7	17.7	93.96	6.04
377	4855649	28岁				112	80.4	24.9	97.67	2.33
378	7143283	30岁				155	88.5	30.3	97.34	2.66
379	7127500	28岁	-4.2α/αα			112	78.2	25.4	81.9	2.43
380	7142684	30岁	-3.7α/αα			152	83	25.9	97.4	2.6
381	5543579	36岁				123	93.9	31.5	95.69	2.28
382	6981029	34岁				158	86.8	29.9	97.21	2.79
383	5960651	26岁	-4.2α/αα		CAP	127.9	81.8	27	97.05	2.95
384	7133143	30岁	--SEA/αα			139	74.2	22	97.54	2.46
385	5803343	28岁	-3.7α/αα		41-42/N	136.2	70.2	22.5	94	6
386	6987381	31岁				120	93.1	31.8	92.19	2.8
387	7032444	27岁				122.2	90.6	31.1	96.75	3.25
388	6603579	25岁			-28/N	108.3	70.1	22.9	94.25	5.75
389	5244252	28岁				127.6	82.8	27.8	63.07	2.57
390	7066022	37岁				160	90.8	30.5	97.46	2.54
391	7088155	28岁				151.9	89.7	30.6	97.12	2.88
392	7070313	27岁				101.9	71.4	23.5	97.52	2.48
393	7000652	29岁				107	77.9	22.8	97.89	2.11
394	7147533	22岁			17/N	112	61.7	19.3	92.83	6.09
395	7130379	38岁				128.7	92.9	31.5	96.35	3.65
396	498472	54岁		αWSα/αα		65	61.2	15.4	98.32	1.68
397	53121	53岁			17/N	95	60.9	18.6	94.33	5.67
398	449005	26岁				88	69.8	20.1	97.86	2.14
399	7131630	33岁				88	67.6	19.1	97.76	2.24
400	6236403	35岁	-3.7α/αα			141.5	77	25.5	97.4	2.6
401	7124136	27岁			17/N	120	64.6	20	90.54	5.36
402	1805100666	32岁				138.2	84.2	28.8	97.28	2.72
403	7136059	31岁	-4.2α/αα		41-42/N	94	67	20.4	94.12	5.88
404	5170465	22岁				120	89.2	30.2	98.4	1.6
405	3234010	36岁				169	90.4	31.8	97.28	2.72
406	5403608	27岁			654-2/N	90.7	59.3	19	93.42	4.94
407	7134223	42岁			41-42/N	121	59.2	18.9	94.42	5.58
408	2692130	35岁		αCSα/αα		124	80.8	26.8	97.94	2.06
409	6999766	28岁				113	89.1	30.9	96.78	3.22
410	7123820	37岁				132	90.7	30.1	96.68	3.32
411	7122051	27岁	-3.7α/αα			139	81.2	25.9	97.57	2.43
412	7058434	26岁				141	93.2	30.1	96.93	3.07
413	4623512	25岁				144	86.1	30.3	97.29	2.71
414	2580058	27岁	-4.2α/αα			129.1	78.2	25.8	97.23	2.77
415	2764734	27岁				151.2	87.9	29.5	96.98	3.02
416	7114280	33岁	--SEA/αα			104.6	66.2	21.6	97.61	2.39
417	1972474	29岁				126.9	88.9	31.1	97.52	2.48
418	3814692	30岁				124	87.7	30	95.66	2.4
419	6807023	21岁	-4.2α/αα			110.5	80.5	27.1	95.26	2.56
420	5204661	26岁				112	87.8	29.6	97.55	2.45
421	6979947	27岁	-3.7α/αα			106.4	76.2	25.4	96.1	2.58
422	4805529	28岁	--SEA/αα			95	67.8	22.1	97.46	2.54
423	5780809	42岁	-3.7α/αα			123.3	80.5	27.1	97.75	2.25
424	4906729	29岁				116	80.8	27.5	96.76	3.24
425	7153962	18岁				88	74.1	22.2	97.59	2.41
426	4476352	23岁	--SEA/αα			110.7	70.7	22	97.48	2.52
427	7042690	29岁				153	87.1	29.1	96.73	3.27
428	7051074	25岁				124	79.4	26.4	97.35	2.65
429	6938331	29岁				115.9	81.7	27.8	96.86	3.14
430	394703	33岁				113.4	87.3	30.3	97.02	2.98
431	7155703	27岁				138	86.9	27.8	96.9	3.1
432	7155264	24岁				118.7	86.8	28.3	96.37	3.63
433	7129801	26岁	--SEA/αα			116.1	67.2	22	97.3	2.7
434	5399322	31岁				103	91.3	30.7	96.18	1.13
435	2626667	25岁		αQSα/αα		152	74.9	24.3	97.24	2.76
436	6955383	21岁			654-2/N	94.6	62.7	20.4	91.88	5.77
437	7167654	22岁			-28/N	116	70.3	22.4	92.14	6.01
438	4275819	28岁				146	88.2	30.7	96.88	3.12
439	7137398	24岁				119	94.7	31.6	88.94	1.29
440	7167637	23岁	--SEA/αα			111.3	64.5	21.3	97.32	2.68
441	7051403	28岁				119.7	90.5	30.7	97.25	2.75
442	7091284	26岁	--SEA/αα	αWSα/αα		126.6	63.9	20	97.47	2.53
443	7178661	29岁				151	85.8	29.1	97.35	2.65
444	1346818	29岁				108.5	79.4	26.3	97.4	2.6
445	7178526	30岁	--SEA/αα			151.4	68	22	97.55	2.45
446	3198121	28岁				128	89	29.2	97.36	2.64
447	5461526	30岁				124	90.4	29	98.6	1.4
448	6327701	24岁				115	76.3	24.7	97.32	2.68
449	4122680	28岁	--SEA/αα		27-28/N	148	76.5	24.5	93.88	6.12
450	6958315	27岁				112.5	93.2	31.6	97.15	2.85
451	7027410	22岁	--SEA/αα			108.9	66.9	21.1	97.82	2.18
452	2659692	38岁				112.5	86.3	28.9	96.87	3.13
453	6969315	34岁				162	89.6	30	96.67	3.33
454	4774404	27岁				114.1	86.5	29.2	84.4	2.92
455	6918371	37岁	-4.2α/αα			102.9	81.6	26.7	97.18	2.82
456	7162427	27岁				104	76.1	22.6	97.85	2.15
457	507331	49岁				88	79	24	97.85	2.15
458	7024072	27岁				115	85.4	28.9	96.39	3.61
459	1423001	31岁				106	86.8	28.6	97	3
460	5216255	26岁				133	86.6	27.9	96.66	3.34
461	4816926	25岁				122	83.6	29.5	96.48	3.52
462	7113216	28岁			654-2/N	126	65	20.7	93.26	4.93
463	7034864	28岁				129	88.7	29.7	96.4	3.6
464	7029317	27岁	--SEA/αα			151	67.6	22.7	94.48	1.09
465	7029317	27岁	--SEA/αα			151	67.6	22.7	94.48	1.09
466	6893874	29岁				119	73.7	21.2	97.84	2.16
467	5340076	29岁			654-2/N	136	60	18.5	94	5.6
468	4321521	29岁				131	95	31.2	97.34	2.66
469	507349	53岁				96	73.1	22.3	97.63	2.37
470	6463389	43岁				128	94.8	31.9	96.71	3.29
471	6681208	29岁				125.9	86.6	30.2	97.57	2.43
472	4545190	31岁	--SEA/αα			103	66.8	21.6	97.58	2.42
473	1909156	33岁	-3.7α/αα			129	82.9	27.6	97.58	2.42
474	7181216	27岁				104.7	93.7	32.6	96.83	3.17
475	5957690	27岁				121	99.7	33.5	97.01	2.99
476	6023321	30岁				87	72.4	21.2	97.64	2.36
477	3485881	37岁				111.7	81.2	27.8	97.53	2.47
478	7105473	25岁	--SEA/αα			137	70.2	21.7	97.24	2.76
479	7120550	37岁				90	101.2	35.2	94.32	2.83
480	7045833	31岁				137	85.7	27.7	97.7	2.3
481	5818320	35岁				154	88.8	28.6	96.95	3.05
482	5754359	31岁			654-2/N	96	61.1	19	93.16	5.08
483	7174108	28岁	--SEA/αα			132	70.8	22.6	97.41	2.59
484	7092464	24岁				111	90.2	29.4	97.11	2.89
485	4607701	28岁				105.7	74	24.3	97.39	2.61
486	7153128	21岁				111	86.7	30.1	96.81	3.19
487	7146612	35岁				101.1	69.4	22.5	97.56	2.44
488	7175904	38岁				146	89.3	31.3	96.55	3.45
489	5656089	25岁				156	82.8	27.7	97.26	2.74
490	2568982	31岁				111	83.7	27.9	96.44	3.56
491	7196145	28岁		αQSα/αα		138	75.6	23.2	97.46	2.54
492	6304993	34岁				120	90.5	30.1	97.09	2.91
493	4955168	28岁				116	91.2	30.9	96.77	2.47
494	7122202	28岁	-4.2α/αα			100	86	28.1	97.65	2.35
495	4466056	30岁				114.3	82.4	27.9	97.37	2.63
496	4968397	26岁				114	93.8	32.4	96.36	3.64
497	7120643	23岁	--SEA/αα			111	67.2	21.3	95.47	2.69
498	6926394	27岁				115.9	89.7	30.7	96.93	3.07
499	7132198	23岁				147	86.7	29.6	97.42	2.58
500	5287391	37岁	--SEA/αα			135	64.6	20.5	97.57	2.43
501	4719122	33岁				125	82.5	28.1	97.62	2.38
502	6882063	26岁				111	99.1	33	97.11	2.89
503	7006165	37岁	-3.7α/αα			145	83.8	26.4	97.57	2.43
504	7187761	29岁				131	87.5	29.2	98.23	1.77
505	7197821	36岁	--SEA/αα			131	77.8	22.7	97.39	2.61
506	195135	36岁			654-2/N	145	65	20.5	91.34	6.41
507	3803773	41岁				126	87.9	29.3	96.65	3.35
508	5515146	44岁				79	71	18.8	97.97	2.03
509	3988729	35岁				133.2	84.7	29.5	97.09	2.91
510	600976	58岁				80	108.2	34.5	97.31	2.69
511	6101407	27岁				121	89	29.7	97.54	2.46
512	5862644	25岁	--SEA/αα			97	69.4	21.7	97.64	2.36
513	7135543	28岁	-3.7α/αα			117	90.3	29.8	96.86	3.14
514	3830320	30岁				116	90.5	29.1	97.62	2.38
515	6882218	28岁				123	89.8	29.8	97.68	2.32
516	7107149	25岁				122	86.3	28.8	98.6	1.4
517	6368217	24岁				105	96.6	32.6	96.87	3.13
518	5448612	32岁				155	90.9	31.9	96.94	3.06
519	6998884	38岁				151	90.8	30.3	97.31	2.69
520	3787571	37岁				127	91.3	31.6	94.57	3.05
521	7170746	25岁				155.4	91.9	31.6	97.24	2.76
522	7209776	46岁			41-42/N	79	57.4	16	93.35	5.03
523	1941049	28岁				127	95.9	32.4	96.79	3.21
524	233712	40岁				118	90.5	30.3	97.34	2.66
525	4502774	25岁				133	86.7	29.1	97.32	2.68
526	7179981	37岁				130	90.1	30.6	96.85	3.15
527	5299709	26岁				116	80.6	26.8	96.99	3.01
528	7189047	31岁	-4.2α/αα			116	62.6	19.1	98.13	1.87
529	7158809	30岁	--SEA/αα			118	67.4	21	97.29	2.71
530	7136799	45岁			41-42/N	121	60.2	18.9	92.28	5.19
531	2061404	35岁				116	100	32.7	97.77	2.78
532	7167904	26岁	--SEA/αα			114	68.4	21.4	97.45	2.55
533	7190777	27岁				118	91.2	30.6	97.05	2.95
534	6842566	28岁				135.4	87.37	29.6	96.81	3.19
535	4746251	31岁				121.2	78.7	26.6	97.3	2.7
536	5117179	34岁				118	96.1	32.6	97.66	2.34
537	7095874	29岁				105	88.9	28.6	97.61	2.39
538	2150603	29岁			654-2/N	94	62.7	20.4	94.7	5.3
539	7219857	28岁				162	83	29.3	97.17	2.83
540	7061415	28岁			41-42/N	107	64.8	20.5	94.51	5.49
541	4430190	25岁				99.8	98.4	32.8	92.59	2.98
542	7142536	28岁				158	86.3	29.2	97.29	2.71
543	3949655	31岁				118	78.68	26.6	97.43	2.57
544	6406170	27岁	-4.2α/αα			124.4	79.8	27	97.07	2.93
545	7003476	32岁	--SEA/αα			114	67.5	20.8	97.64	2.36
546	1125563	33岁				110	92.7	30.9	93.56	2.18
547	3407987	31岁				167	91.8	32	96.94	3.06
548	7141642	35岁				145	86.2	28.7	97.3	2.7
549	6962626	25岁				121	81.5	26.9	97.52	2.48
550	5117235	35岁			654-2/N	110	59.9	19.4	92.23	5.92
551	5504508	36岁				114	86.4	27.1	97.51	2.49
552	6970690	29岁	--SEA/αα			119	70.7	23.4	96.93	3.07
553	6212791	29岁				129.5	91	31.4	96.99	3.01
554	3544918	30岁				93	65	20.6	95.79	2.48
555	7215614	33岁				124	88.6	30.2	97.54	2.46
556	7204161	28岁				147	88.4	29.9	97.16	2.84
557	6240172	26岁				134	93.3	31.2	98.38	1.62
558	4841351	35岁				126.7	82.7	28	95.48	2.55
559	6644881	24岁				124.7	88.6	30.3	97.3	2.7
560	4117149	29岁			654-2/N	92	61.8	19.7	94.52	5.48
561	4521309	27岁			654-2/N	113	64.1	20.7	94.84	5.16
562	4355012	27岁				120	89.6	31.1	96.11	1.54
563	2278852	29岁				139	89.5	29.8	97.32	2.68
564	6149446	35岁				129	94.1	30.5	96.38	3.62
565	6024540	22岁				118	83	27.4	97.46	2.54
566	5246254	28岁				119	86	28.8	97.1	2.9
567	7140745	28岁			41-42/N	97	63.2	20.4	92.42	4.98
568	7128195	28岁				106	88.5	31.2	93.18	2.92
569	7080071	30岁				122	89.5	30.4	97.26	2.74
570	1972230	33岁				94	105.8	36.2	90.69	2.51
571	275509	30岁				111	91.1	31	97.52	2.48
572	7253997	27岁				169	90.8	31.7	96.99	3.01
573	7146427	31岁	--SEA/αα			103	68.5	22.2	97.5	2.5
574	5340284	35岁				127.3	87.4	30.1	97.06	2.94
575	3871535	25岁				110	94.5	31.8	98.36	1.64
576	7044514	27岁				151	86.9	29.5	97.09	2.91
577	7253896	30岁	--SEA/αα			106	69.1	22	97.67	2.33
578	6930582	28岁	--SEA/αα			117	63.8	20.3	97.12	2.88
579	4467563	36岁				134	80	26.8	97.01	2.99
580	7119359	42岁				82	62.2	17.6	97.5	2.5
581	7186393	35岁				163	94.8	31.3	96.94	3.06
582	4554920	37岁				139	87.8	31	97.01	2.99
583	2126889	34岁				117.9	86.7	29.7	97.03	2.97
584	1837522	34岁	-4.2α/αα			142	79.7	25.9	97.48	2.52
585	7105582	32岁	-3.7α/αα			146	82.7	26.3	97.52	2.48
586	5444047	31岁	--SEA/αα		654-2/N	128	72.1	21.7	94.56	5.04
587	4350001	33岁				122	77	26.2	97.11	2.89
588	0379084	33岁	--SEA/αα			113	65.3	21.3	97.32	2.68
589	7059366	24岁				104	89	30.1	97.11	2.89
590	7151369	31岁				123	98.9	34.8	94.35	2.74
591	118758	35岁				129	89.8	30.6	97.19	2.81
592	7172241	29岁			-28/N	101	67.4	21.8	94.49	5.51
593	4127263	49岁			654-2/N	88	64.7	19.6	91.89	5.1
594	5067108	40岁				135.9	90.3	31.6	97.14	2.86
595	853222	34岁				133	90.5	30.7	96.81	3.19
596	4214863	36岁	--SEA/αα			115	66.1	20.7	97.76	2.24
597	2193256	36岁			17/N	93	60.5	19.6	93.08	5.3
598	5773319	25岁				129	84	29.1	97.72	2.28
599	7255206	24岁	--SEA/αα			114.2	70.4	22.9	97.44	2.56
600	4805043	38岁	-4.2α/αα			101	90.4	28.5	97.71	2.29
601	7110735	31岁				121	80.4	26	97.45	2.55
602	6932615	27岁				129	90.4	30.4	94.6	2.8
603	7285805	29岁				152	84.9	27.3	97.28	2.72
604	1156468	34岁	--SEA/αα			103	67.5	20.9	97.32	2.68
605	7154452	34岁				139	87.6	29.6	96.68	1.4
606	7221196	28岁				158	84.41	28.7	97.27	2.73
607	4181782	26岁	--SEA/αα			118.4	66.1	21.2	97.63	2.37
608	6605757	25岁	-4.2α/αα			114	70.7	21.8	97.64	2.36
609	5310436	25岁				156	86.6	28.9	96.92	3.08
610	7267335	29岁			41-42/N	128	57.7	18.9	94.4	5.6
611	2686229	30岁				129	87.5	28.8	96.94	3.06
612	4246386	31岁				135.9	92.7	31.7	97.11	2.89
613	7103254	27岁				128	86.4	30.6	96.98	3.02
614	0392657	31岁				127	93.4	32.1	97.27	2.73
615	6131682	25岁				122	86.8	27.2	97.6	2.4
616	3604982	30岁				117	83.8	28.3	96.93	3.07
617	3587561	29岁				121	89.6	30.3	97.26	2.74
618	7267338	24岁				129	80.6	25.9	97.83	2.17
619	7274147	51岁	--SEA/αα			119	71.2	22.3	97.48	2.52
620	0281840	39岁				129	86.5	29.1	97.3	2.7
621	7187965	32岁				147	87.3	31.1	97.05	2.95
622	1807170643	41岁				166	90.1	30	97.84	2.16
623	4289057	38岁				134	86.6	29.5	97.54	2.46
624	2341541	33岁				113	88.5	30.2	97.59	2.41
625	3422624	26岁				128	89.7	30	97.7	2.3
626	7298576	28岁				168	90.2	30.9	97.6	2.4
627	6327903	26岁				112	89.7	31.9	96.97	3.03
628	7284628	20岁			654-2/N	92	62.8	20	93.24	4.78
629	7260503	32岁				106	79.2	25.1	97.23	2.77
630	5808876	30岁			71-72/N	121	61	20.4	93.35	5.05
631	7259182	27岁				128	80.4	26.7	97.5	2.5
632	4882354	32岁				120	87.6	29.7	97.65	2.35
633	7296019	24岁				129	86.2	29.3	95.8	2.61
634	7297268	26岁			654-2/N	126	63.4	20	93.49	5.17
635	7297424	28岁				146	89.4	30.3	97.14	2.86
636	7189444	26岁				123	91.3	29.7	96.23	3.77
637	7245369	28岁				81	73.4	21.1	97.77	2.23
638	7299983	18岁				112	89.7	28.8	97.68	2.32
639	7181792	36岁				118	88.9	29.8	97.17	2.83
640	7141451	34岁				120.8	85.1	28.8	97.35	2.65
641	4194695	39岁				129	91.9	30.7	96.83	2.73
642	4846488	27岁				124	91.7	32.1	92.23	2.58
643	349598	55岁	--SEA/αα			113	68.6	20.5	97.7	2.3
644	6863107	29岁				135	75	26.5	96.84	3.16
645	7282875	18岁		αQSα/αCSα		98	73.9	22.3	97.543	1.38
646	4681352	37岁				129	88.4	29.9	97.13	2.87
647	1570484	45岁			17/N	127.7	63.6	19.9	94.3	5.7
648	6791897	28岁				130	85.7	28.6	97.68	2.32
649	7218573	25岁				98	76.2	23.8	97.61	2.39
650	4156683	35岁	--SEA/αα			104	69	21.3	97.36	2.61
651	7231046	25岁				151	92.3	31.5	97.83	2.17
652	6013535	30岁	--SEA/αα			112	68.7	20.4	97.44	2.56
653	7110839	23岁				132	91.8	30.8	96.45	2.44
654	2025295	32岁	-4.2α/αα			126	82.9	26	97.58	2.42
655	7256441	23岁				122	87	32	97.52	2.48
656	5406108	26岁	--SEA/αα			105	69.5	22.5	97.62	2.38
657	7299896	21岁				113	93.3	31.9	97.36	2.64
658	4412392	18岁	-3.7α/αα			157	82.5	25.6	97.13	2.87
659	3049773	29岁				106	88	30.2	96.77	3.23
660	7293676	33岁				100	71.5	20.5	98.07	1.93
661	7234043	36岁				87	74.2	22.2	97.54	2.46
662	1983254	33岁				130	85	29.1	96.84	3.16
663	7290251	25岁		αCSα/αα		127	78.2	26.4	98.05	1.95
664	7289870	25岁				158.5	86.22	29.69	97.34	2.66
665	5396651	28岁				133	88.2	30.8	97.23	2.77
666	5725327	40岁				116	92.3	32	97.22	1.55
667	3170997	26岁				96	75.7	22.6	97.69	2.31
668	5988652	29岁				130	85.3	28.9	97.42	2.58
669	5829222	25岁				130	85.3	28.9	97.42	2.58
670	5582381	27岁				101	57.8	17.5	97.87	2.13
671	7241926	25岁			41-42/N	88	63	20.2	91.73	4.67
672	7182503	26岁				124	85.9	28.1	97	3
673	6963579	27岁				123	92.7	31.1	97.55	2.45
674	0645054	38岁				119	88.1	30	97.84	2.16
675	7171660	29岁				104	80.7	25.4	97.43	2.57
676	7296993	34岁				95	79	25.3	97.19	2.81
677	5133054	32岁	-3.7α/αα			124	81.9	26.4	97.52	2.48
678	7303477	25岁	--THAI/αα			100	71.9	21.6	97.69	2.31
679	7240873	41岁				157	91.1	31.9	97.14	2.86
680	0496585	28岁				133	86	29.2	97.93	2.07
681	7199707	27岁				112	88.3	29.9	97.59	2.41
682	4485749	34岁				141	90.5	30.3	97.55	2.45
683	347149	42岁				99	70.8	21.2	98.21	1.79
684	7141410	34岁				106	93.4	30.5	96.11	2.62
685	7301222	21岁	--SEA/αα			140	63.2	19.9	97.5	2.5
686	1870866	33岁				99.5	84	29.5	95.49	2.86
687	7310677	29岁				155.6	91.1	30.4	97.57	2.43
688	7191532	44岁				123	88.5	27.6	97.39	2.61
689	7323951	23岁	--SEA/αα			113.6	65	20.6	97.66	2.34
690	7312320	45岁				127.8	75.2	24.5	97.62	2.38
691	7018976	29岁	-3.7α/αα			115	81.5	26.9	97.08	2.92
692	0440762	29岁	-3.7α/αα			129	88.5	29.2	97.51	2.49
693	7293973	50岁	--SEA/αα			125	66.5	20.5	97.63	2.37
694	7282751	30岁				126	82.4	27.4	97.58	2.42
695	5362038	28岁				99	72.4	21.7	98.07	1.93
696	7338968	27岁				157	90.5	30.4	97.3	2.7
697	4384534	33岁				123	85.2	28.9	96.01	3.99
698	6378253	26岁				111	93.5	29.9	97.69	2.31
699	7198152	30岁				132	79.9	26.5	97.42	2.58
700	7258963	21岁	--SEA/αα	αWSα/αα		104	63.9	20	97.55	2.45
701	5978716	27岁	--SEA/αα			101	70.4	22.3	96.55	3.45
702	7231440	36岁	--SEA/αα			110.8	68	22.2	97.86	2.14
703	7312381	27岁				111	76.3	24.6	97.88	2.12
704	3360726	28岁				119	89.9	30.7	97.57	2.43
705	6786560	21岁				113	88.3	30	95.72	3.02
706	4731488	34岁				118	84.4	28.7	97.34	2.66
707	3895051	43岁				132	91.4	29.9	97.13	2.87
708	2940052	42岁				121	87.8	30.1	95.79	2.9
709	3023878	27岁			41-42/N	104	61.1	20.1	92.77	5.51
710	5219613	28岁				120	90	31.5	97.35	2.65
711	5979319	24岁				116	87.3	28.9	97.11	2.89
712	3885918	33岁				127	90	30.3	97.21	2.79
713	606152	39岁	--SEA/αα			97	69.9	21.5	97.68	2.32
714	3933902	29岁				134	82.8	28.8	97.23	2.77
715	7350593	28岁				136	84.1	29.5	97.52	2.48
716	7351323	32岁				148	91.2	30.5	95.9	2.69
717	7243430	28岁			17/N	91	60.2	19.7	93.74	4.84
718	7131608	30岁			41-42/N	93	63	20.4	93.6	4.98
719	7350933	31岁				115.3	95.4	32.3	96.51	3.49
720	7333490	27岁	--SEA/αα			106	68.5	22.1	97.7	2.3
721	7350387	32岁	--SEA/αα			121.5	68.9	21.9	97.54	2.46
722	3994438	26岁				149	88.6	30.2	97.19	2.81
723	7338846	19岁				101	87.1	28.9	96.12	3.88
724	1897023	35岁				153	85.4	30.2	97.13	2.87
725	6485885	31岁				90.3	80.6	27.1	97.47	2.53
726	6822681	32岁				124.5	89	30.6	96.26	2.44
727	6985991	29岁				119.8	87.3	30.2	96.41	3.59
728	7361463	28岁				158	81	28	78.32	2.07
729	6432317	29岁	-3.7α/αα			120	81.3	26.4	97.52	2.48
730	6010462	28岁	--SEA/αα			97	63.1	20.1	97.51	2.49
731	5488844	40岁	-3.7α/αα			112	80.7	26.7	95.32	2.53
732	3601443	44岁				145	94.4	31	97.57	2.43
733	7323837	20岁				93	87.8	28.3	97.7	2.3
734	7173861	28岁	--SEA/αα			140	65.8	21.4	97.51	2.49
735	7213560	30岁				105	68.7	21.8	97.27	2.73
736	76915	45岁	-3.7α/αα			78	67.1	18.1	97.97	2.03
737	7306575	30岁	--SEA/αα			132	67.4	20.3	97.71	2.29
738	2573956	37岁				123	92.4	31.1	97.18	2.82
739	4525106	30岁				131.6	92	31.7	97.46	2.54
740	7237530	44岁				137	90.4	30.7	97.79	2.21
741	2059603	31岁				145	82.6	28.1	97.42	2.58
742	6847823	28岁				101	73.9	22.7	97.82	2.18
743	4274080	37岁				138	91.5	30.1	97.45	2.55
744	7323208	27岁	--SEA/αα			130	71.7	22.2	97.88	2.12
745	1206825	32岁				128	86.4	28.4	97.19	2.81
746	7083456	26岁				112	92.7	31.3	96.88	3.12
747	3451115	34岁				113	88.9	29.8	97.06	2.94
748	6070059	26岁				115	87	27.7	97.67	2.33
749	0938376	43岁				134	90.8	30.7	96.52	3.48
750	7261822	25岁			654-2/N	135	60.38	18.4	94.48	5.52
751	5965997	34岁				127	74.3	24.8	97.63	2.37
752	3052592	29岁				129	93.4	31.7	97.48	2.52
753	7370755	29岁	--SEA/αα			112.6	65	20.7	97.79	2.21
754	7049134	39岁				104.8	80.7	26.8	97.28	2.64
755	4214862	40岁				156	89.7	31.5	97.35	2.65
756	7222985	28岁		αCSα/αα		113	80	26.3	97.91	2.09
757	3196658	27岁				126	89.8	30.7	97.51	2.49
758	4777656	28岁				122	96.5	32.5	97.05	2.95
759	4834923	32岁			654-2/N	127	62.1	18.9	94.81	5.19
760	6980256	27岁				164	90.4	29.8	97.26	2.74
761	1412973	33岁				124	84.5	28.7	97.39	2.61
762	5279077	27岁			654-2/N	100	60.8	20.8	92.8	5.62
763	6232111	29岁				145.1	81	27.3	61.78	2.49
764	7216978	30岁			654-2/N	84.6	64.6	20.9	93.07	5.16
765	7375356	38岁				152.9	85.7	28.9	97.24	2.79
766	7184724	37岁				129	95.1	31.5	97.32	2.68
767	7307500	25岁				150.2	92.7	31.6	97.11	2.89
768	5868592	27岁				131.9	88.4	30.2	60.78	2.37
769	7370456	27岁				157.2	89.2	30.1	97.39	2.61
770	485731	34岁	--SEA/αα			101	68.6	22.3	97.31	2.69
771	1882389	36岁				137	95.8	31.9	97.62	2.38
772	4345029	27岁				130	77.2	26	97.56	2.44
773	6207299	27岁	-4.2α/αα			141	75.2	24.1	96.86	3.14
774	607858	35岁	-3.7α/αα			84	76.7	22	97.92	2.08
775	403735	52岁			17/N	97	66.7	19.6	94.43	5.57
776	7211984	43岁	--SEA/αα			136.8	65.7	20.9	97.66	2.34
777	6709907	43岁				110	88.2	27.6	97.84	2.16
778	7310926	31岁				139	90	30.3	97.34	2.66
779	5639436	32岁				125.6	82.6	27.5	97.22	2.78
780	152991	36岁				153	90.8	32.6	97.29	2.71
781	7365384	29岁	--SEA/αα			137.6	65.4	21	97.48	2.52
782	5773319	25岁				127.1	82.8	28.2	97.72	2.28
783	3708677	31岁				102	88.6	30.5	97.69	2.31
784	4441928	25岁				128.6	89.1	30.8	94.12	2.82
785	7321636	28岁			17/N	98	63.6	20.2	90.31	5.66
786	7364026	28岁	--SEA/αα			100	70.6	22.1	97.68	2.32
787	6579947	34岁				123.1	77.8	25.4	97.55	2.45
788	7183222	31岁				143	103.9	35.1	97.47	2.53
789	7245219	24岁	--SEA/αα			143	70.7	22.1	97.62	2.38
790	7363294	28岁				124	72.5	23.8	97.64	2.36
791	1840045	31岁				111	81.8	27.2	97.1	2.9
792	4266075	31岁				154	88	28.9	96.89	3.11
793	7215774	29岁				114	87.3	29.2	97.59	2.41
794	7126522	29岁				128	90.6	31.6	97.52	2.48
795	7200121	28岁				160	88.2	28.9	97.27	2.73
796	7200133	28岁	--SEA/αα			117	68.8	22.5	95.85	2.23
797	5411910	27岁				99.5	89.8	30.2	96.73	3.27
798	120747	31岁	-3.7α/αα			104	75.8	23.3	98.03	1.97
799	7362433	27岁				169	92	31.4	97.02	2.98
800	7199063	27岁			41-42/N	133	63.8	19.2	94.9	5.1
801	6114952	23岁	--SEA/αα			134	63.2	20.2	97.51	2.49
802	7192942	21岁	--SEA/αα			95	64.2	20.3	97.44	2.56
803	6606235	29岁				127	96.4	32.7	97.47	2.53
804	6935175	26岁				117	84.2	28.9	97.01	2.99
805	4438422	27岁				127	86.2	27.3	97.01	1.14
806	6352272	29岁				116	93.4	30.7	97.57	2.43
807	4624519	32岁				148	91.7	31.6	97.05	2.95
808	5698615	29岁	--SEA/αα			115.1	70.6	22.4	97.72	2.28
809	7267359	28岁			41-42/N	89	66	21.2	92.58	5.23
810	7379943	27岁				145	87.9	30.2	96.57	3.43
811	4580033	34岁	--SEA/αα		14-15/N	125	72	22.9	94.49	5.51
812	0449667	37岁				115	84.7	28.4	97.4	2.6
813	7386053	42岁			654-2/N	70	70.8	19.1	90.48	5.58
814	2566822	38岁				113	88.5	29	97.03	2.97
815	5522736	35岁			41-42/N	121	65	21.9	92.77	5.11
816	7396117	28岁		αCSα/αα		148	82.8	26.2	98.21	1.79
817	7186297	24岁				79	59.4	15.9	97.77	2.33
818	7331399	34岁				144.2	80.1	26.9	97.03	2.97
819	3833583	26岁	--SEA/αα			115	63.8	21.3	96.42	2.47
820	5923655	25岁				115	94.1	32.1	97.56	2.44
821	7396291	34岁				148	92.3	30	97.15	2.85
822	7170572	41岁				148	90.1	30.7	97.26	2.74
823	7307967	33岁				113	73.8	24.2	96	2.45
824	1718696	24岁				127	91.6	31.4	97.15	2.85
825	7368783	34岁				162	89.7	30.2	96.94	3.06
826	7334856	29岁				149	83.2	27.8	96.95	3.05
827	5450531	29岁				127	86.5	29.5	97.54	2.46
828	7280619	26岁				124	80.4	26.4	97.56	2.44
829	7140160	31岁				93	79.2	24.5	97.34	2.66
830	3262835	40岁				118.1	97.6	33.4	97.52	2.48
831	1046479	32岁	-4.2α/αα		41-42/N	143	67.5	21.1	94.39	5.61
832	7345291	24岁				123	82.2	26.3	97.64	2.36
833	7383640	22岁				125	82.5	28	97.58	2.42
834	7357533	31岁				146	88	30.8	97.3	2.7
835	6389626	28岁				112	81.5	26.9	97.54	2.46
836	7387004	30岁				112	88.9	29	97.57	2.43
837	7366765	29岁				151	89	30.1	97.33	2.67
838	7393624	22岁	--SEA/-α3.7	无扩增产物		88	60.8	16.6	98.67	1.33
839	7361233	29岁				121	81.9	27.8	97.24	2.76
840	3744239	36岁				138.9	90.9	31.1	96.3	2.52
841	7369106	25岁				128	81.1	26.8	98.03	1.97
842	3791483	35岁				113	100.3	34.8	84.08	1.62
843	5242882	29岁				120	82	27.6	96.95	3.05
844	7049665	30岁				138	90.3	29.6	97.08	2.92
845	507605	52岁				86	71.5	21.9	98.26	1.74
846	247997	41岁				85	74.5	21.3	98.1	1.9
847	4350775	23岁	-3.7α/αα			126.1	73.5	24.3	97.56	2.44
848	6016053	31岁			654-2/N	88	56.6	16.4	94.88	5.12
849	7290929	31岁				117.7	94.4	32	97.15	2.85
850	5349966	28岁				162	86.5	28.8	97.53	2.47
851	4627426	36岁				120	91.2	31	97.07	2.93
852	1255837	32岁				118	84.1	28.9	97.25	2.75
853	6847270	36岁				87	72.6	21.5	97.9	2.1
854	7185109	25岁				87	71.9	20.6	98.12	1.88
855	4331957	28岁			654-2/N	117	67.2	21.5	91.74	5.22
856	6756685	28岁				121.7	95.5	31.9	96.93	3.07
857	7427194	36岁			41-42/N	119	59.1	18	92.79	5.81
858	1699227	28岁	--SEA/αα			147	69.5	21.4	97.75	2.25
859	6981220	24岁				155.9	84.3	29	97.63	2.37
860	7371789	28岁	--SEA/αα			137	67.5	21.6	97.63	2.37
861	7332187	32岁				111	89.4	29.3	97.38	2.62
862	7377091	31岁		αQSα/αα		105.8	73.1	23.9	97.52	2.48
863	5816683	24岁				133	88.1	28.2	97.57	2.43
864	6943189	35岁				126	96.3	33	98.5	1.5
865	6072016	27岁		αCSα/αα		103.9	84.7	28.5	97.8	2.2
866	627179	29岁			654-2/N	114	62.1	21.1	93.17	4.62
867	4823720	28岁			41-42/N	114	66.1	21	91.09	4.59
868	7397060	29岁	-3.7α/αα			161	81.3	27.6	97.58	2.42
869	6270251	29岁				145	82.6	27.5	97.45	2.55
870	7369763	25岁				117	85.3	30.1	96.94	3.06
871	7412193	24岁	-4.2α/αα		41-42/N	113	63	21.3	94.02	5.98
872	7428321	26岁				96.1	83.9	28.2	97.71	2.29
873	4939684	32岁	-3.7α/αα			118	75.6	23.8	97.38	2.62
874	3222434	28岁				106.9	85.7	29.3	97.6	2.4
875	3222439	28岁	-3.7α/αα			132.2	81.4	26.4	97.55	2.45
876	3386984	35岁				137	87.7	29.5	97.62	2.38
877	4808592	30岁				113	78.7	23.6	97.6	2.4
878	7359968	30岁				142.6	90.2	31	96.07	2.38
879	5438527	27岁				101.7	89.6	31	97.5	2.5
880	5714290	30岁				119	88.5	29.8	97.16	2.84
881	7382291	24岁	--SEA/αα			111.2	64.2	20.6	97.71	2.29
882	7124572	35岁	-3.7α/αα			106	85.2	27.6	97.73	2.27
883	5152025	32岁				98	77	24.7	97.45	2.55
884	1341023	37岁				124.9	80.6	27.2	97.49	2.51
885	3195774	34岁				112	83	26.4	97.48	2.52
886	611530	47岁				106	67.2	19.9	98	2
887	5151888	31岁				154.1	83.9	29.3	97.38	2.62
888	7436508	32岁	-3.7α/αα			131.4	80.7	26.8	97.43	2.57
889	4823728	33岁				163	91	31.8	97.18	2.82
890	7300037	27岁				122.7	93.4	31.6	97.4	2.6
891	7125247	25岁				95	86.6	29	96.87	3.13
892	5486248	28岁				134.1	93.6	31.6	82.27	2.75
893	7316666	24岁	-3.7α/αα			118	82.2	26.9	97.38	2.62
894	7323710	23岁				93	73.9	22.7	97.28	2.72
895	7365872	23岁				145	91.2	31.2	97.45	2.55
896	6882359	25岁				124	91.1	30.5	97.55	2.45
897	5621143	40岁				121.7	91.3	31.3	96.9	3.1
898	4493914	27岁	--SEA/αα			111.2	65.3	21.3	97.49	2.51
899	7459090	29岁			17/N	123.4	61.2	19.2	94.39	5.61
900	7419269	28岁	--SEA/αα			106	63.1	20.4	97.91	2.09
901	5760282	30岁				119.7	87.3	29.6	97.24	2.76
902	5584657	31岁				105	73.3	23.8	97.66	2.34
903	5209909	36岁				118	91	31.3	97.4	2.6
904	7303654	30岁				151	84.7	28.6	97.89	2.11
905	5698185	30岁				138	83.7	28.8	97.03	2.97
906	3726876	33岁				135	87.3	29.5	96.98	3.02
907	7405540	29岁	--SEA/αα			117	64.4	21	97.69	2.31
908	1550214	35岁				119	83.4	27.7	97.51	2.49
909	7412370	29岁				164.5	89.9	30.5	97.52	2.48
910	7368734	25岁			654-2/N	132	63.5	20.9	95.45	4.55
911	7480777	34岁	--SEA/-α4.2	无扩增产物		77	68.5	19.7	88.12	1.04
912	6926639	27岁			654-2/N	94.4	61.8	20.1	95.05	4.95
913	6495470	28岁				125.8	89.6	31	96.32	3.68
914	233884	37岁	-3.7α/αα			114.3	86.1	29.2	97.53	2.46
915	6149300	27岁				127	91	30.2	97.22	2.78
916	6268425	31岁				125	79.9	26.5	97.4	2.6
917	1400491	35岁				123	81.4	26.9	98.7	1.3
918	7401115	28岁				127	90.7	30.8	97.45	2.55
919	4087223	43岁				120.7	92.8	32.1	95.87	2.87
920	7368282	31岁			-28/N	121	69.4	21.9	94.58	5.42
921	6388111	28岁				123	88.8	30.8	97.51	2.49
922	815234	32岁				133.6	81.1	27.3	97.49	2.51
923	613348	52岁				78	69.3	19	97.87	2.13
924	7406840	37岁				128	88.5	30.5	94.4	2.97
925	7068302	26岁				125	80.2	25.6	97.55	2.45
926	3775183	38岁				123.9	92	30.6	97.51	2.49
927	6329012	29岁				101	79.1	25.4	97.62	2.38
928	7424719	27岁				131.6	71.6	23.9	96.61	3.39
929	3793240	34岁				111	82.1	28.3	97.67	2.33
930	7361853	22岁				123	86.3	29.6	97.09	2.91
931	3813205	36岁				113.7	92.3	31.4	97.62	2.38
932	613827	44岁				87	74.6	22.5	97.53	2.47
933	3616230	28岁				123	92.4	31.3	97.35	2.65
934	4344608	28岁				135	82.9	28.4	97.58	2.42
935	4643290	26岁	--SEA/αα			117	64.3	20.6	97.38	2.62
936	746946	35岁				120	89.9	30.3	97.01	2.99
937	6583577	31岁				118.4	85	29.4	97.54	2.46
938	7478470	26岁			654-2/N	93	62.4	20.8	91.78	5.09
939	7375932	28岁				126	87.3	30.3	97.53	2.47
940	7307554	26岁	--SEA/αα			114	70.6	22.3	97.72	2.28
941	7316079	29岁	-3.7α/αα			116	89.7	29.8	97.61	2.39
942	4675261	30岁				113	74.8	23.7	97.43	2.57
943	5281857	36岁				140	87.7	31.9	97.5	2.5
944	7438990	36岁	-4.2α/αα			120	85.3	28	97.27	2.73
945	6700510	29岁	--SEA/αα			108	70.2	22.2	98.08	1.92
946	7094867	30岁	-3.7α/αα			120	78.9	26.6	97.58	2.42
947	2048913	38岁				173	83.1	29.3	97.32	2.68
948	2211581	32岁	-3.7α/αα			132	82.3	26.6	97.57	2.43
949	6834004	25岁				131	95.3	32.5	97.69	2.31
950	6935253	48岁			17/N	110.4	61.3	19.5	94.72	5.28
951	3838561	33岁				127	85.5	29.3	97.39	2.61
952	4243333	30岁				96.2	68.3	21.7	97.81	2.19
953	7348219	24岁				115.8	90.8	30.7	96.47	3.53
954	7359169	21岁				128	79.9	25.8	97.5	2.5
955	2239970	32岁				118	88.9	29.1	97.29	2.71
956	159422	31岁	-3.7α/αα			124	78.3	26.2	97.2	2.8
957	6324607	37岁	--SEA/αα			111	68.8	22.1	97.7	2.3
958	7494965	22岁				85	65.7	18.4	98.1	1.9
959	7505144	31岁				157	85.9	29.2	97.6	2.4
960	4919158	39岁				121	88.7	31	97.38	2.62
961	7443468	26岁	--SEA/αα			105.9	66.2	21.3	97.49	2.51
962	7371613	23岁	--SEA/αα			112	65.9	21.1	97.59	2.41
963	3296053	32岁	--SEA/αα			107.5	71.7	23.1	97.72	2.28
964	2137931	31岁				111	78.7	25.9	97.46	2.54
965	1618068	32岁	--SEA/αα			108.3	71.4	22.5	97.71	2.29
966	7497116	22岁				123	79.7	26.5	97.74	2.26
967	1159721	31岁				103.1	81.8	27.4	97.81	2.19
968	7407503	28岁				115	95.5	32.3	97.24	2.76
969	6045432	39岁				107.3	90.9	31.3	97.23	2.77
970	7342075	25岁				119	87.9	30.6	83.1	2.49
971	7352722	22岁				119	89.2	30.7	97.54	2.46
972	1475595	25岁				151	88.7	30.4	78.57	1.65
973	7486001	32岁				114.3	84.8	28	97.6	2.4
974	6172731	30岁	--SEA/αα			150	70.8	22	97.25	2.75
975	7524641	30岁				163	87.2	29	97.3	2.7
976	7401820	25岁				123.6	72.6	23.9	97.47	2.53
977	5242376	28岁				125	85.3	28.7	96.89	3.11
978	7407693	28岁				101	72.6	22.3	97.69	2.31
979	1501076	30岁	--SEA/αα			113	69.2	21.5	97.64	2.36
980	4037591	33岁				155	80	27.4	97.62	2.38
981	4696201	32岁				131	89	30.1	97.53	2.47
982	5313675	34岁				125.8	85.5	29.1	97.68	2.32
983	1626230	36岁				122	89.4	29.4	97.45	2.55
984	1128285	31岁				110	90.5	30.7	95.44	2.82
985	6335280	25岁				119.1	83.6	28.2	97.54	2.46
986	156022	54岁				98	91.8	32.2	97.76	2.24
987	5896567	40岁				125	89.4	31.6	97.27	2.73
988	7157023	28岁	-3.7α/αα			118	77.9	25.6	97.9	2.1
989	7461910	30岁				113	95.7	32.6	96.84	3.16
990	6935530	30岁				117	89.7	31.6	97.5	2.5
991	6130737	33岁			17/N	134	62.3	20.5	93.87	4.93
992	7471597	27岁				111.6	81.9	27.9	97.39	2.61
993	6996617	26岁			654-2/N	98	66.5	21.1	94.62	5.38
994	523668	35岁				102	85.8	29.7	97.13	2.87
995	7455455	36岁	-3.7α/αα			146.9	79.3	26.4	97.31	2.69
996	7183226	31岁	-3.7α/αα			154	78.2	26.1	97.55	2.45
997	615719	50岁				112	89.5	29.5	97.58	2.42
998	7514093	27岁	--SEA/αα			136	65.8	20.5	97.57	2.43
999	7094151	26岁				122	90.8	30.2	94.37	2.73
1000	6033979	39岁				157.3	85.7	28.9	97.01	2.99
1001	1279489	36岁				146	89.8	30.4	97.3	2.7
1002	1837790	31岁				126.4	82.4	28.6	97.12	2.88
1003	7450628	37岁				128	90	30.5	97.36	2.64
1004	7541760	25岁				120	94.4	30.8	97.09	2.91
1005	4122019	28岁				125	78.8	26.5	97.36	2.64
1006	3992480	28岁				113	93.2	31.8	95.56	2.88
1007	7330213	26岁				126	84.3	28.3	97.28	2.72
1008	4450313	32岁				110.6	81.7	27.9	97.36	2.64
1009	2611478	31岁				151	91.3	31.3	97.33	2.67
1010	6669080	28岁				157	91	29.5	97.45	2.55
1011	3658180	32岁				112.3	79.9	26.1	97.55	2.45
1012	3716657	27岁				140	89.1	29.9	97.56	2.44
1013	7386190	27岁	--SEA/αα			118	62.3	20.1	97.5	2.5
1014	7548162	24岁				85	60.2	16	98.34	1.66
1015	7541760	25岁				120	94.4	30.8	97.09	2.91
1016	6974154	33岁	--SEA/-α3.7	无扩增产物		79	70.1	20.1	84.78	1.04
1017	6502685	24岁		αCSα/αα		113	76.7	25.6	98.07	1.93
1018	3973860	28岁				137	82.1	28.5	97.52	2.48
1019	7498373	22岁			βE/N	121	74.8	25.6	71.9	2.11
1020	7562108	32岁			-28/N	116	74.6	23.6	93.85	4.49
1021	7577775	29岁			41-42/N	131	62.5	20.2	94.6	5.4
1022	7550235	34岁				142	87.1	30.1	97.3	2.7
1023	6488478	28岁				123	91.2	30.9	97.22	2.78
1024	7094481	25岁				120.4	90.8	30.9	97.55	2.45
1025	7480257	25岁				126	86.7	30	97.55	2.45
1026	7398427	31岁				123	76.9	25.1	97.54	2.46
1027	5222489	32岁				98	98.4	30.9	95.47	2.2
1028	338928	33岁				117	76	23.8	97.63	2.37
1029	6459334	30岁	--SEA/αα			112.5	68.8	22.3	97.41	2.59
1030	3571125	35岁				118.6	88	30	97.2	2.8
1031	734965	35岁				113.1	86.7	29.5	97.31	2.69
1032	2055779	33岁				51	113.9	37.2	90.84	2.15
1033	7248744	30岁				132	89.8	32.1	93.83	1.28
1034	6531318	38岁				83	118.9	38.2	97.25	2.75
1035	172721	37岁				125	99.2	32.4	97.36	2.64
1036	7400139	28岁	--SEA/αα			102	66.9	21.8	97.49	2.51
1037	617334	28岁			654-2/N	82	71	22.8	90.79	4.13
1038	5897403	25岁				132	88.4	30.7	93.53	2.47
1039	5893845	34岁	--SEA/-α3.7	无扩增产物		115.6	52.5	16.6	97.33	2.67
1040	7560340	41岁	--SEA/αα			135.4	67.8	21.3	98.05	1.95
1041	3964778	35岁				82	66.7	19.8	97.72	2.28
1042	7499443	27岁				153.7	84.7	28.5	97.08	2.92
1043	7583696	34岁				154	90.2	30.3	97.12	2.88
1044	7554395	27岁	--SEA/αα			141	66.2	20.7	97.6	2.4
1045	7446380	29岁				131	92.4	31.1	97.26	2.74
1046	6328594	28岁				134.4	86.7	29.4	97.7	2.3
1047	6473804	26岁				141	91.7	31.6	97.27	2.73
1048	7375737	35岁				106	90	30.4	97.33	2.67
1049	4542436	32岁				158	81.9	28.5	97.3	2.7
1050	7425049	26岁	--SEA/αα			112	65.1	21.3	97.76	2.24
1051	4249807	29岁	-3.7α/αα			123.6	81.1	27.7	97.3	2.7
1052	7428869	38岁				100	78.5	23.9	97.96	2.04
1053	6383385	28岁	--SEA/αα			101	70.3	21	97.77	2.23
1054	4590917	23岁				141	89.3	30.9	97	3
1055	3819883	31岁	-3.7α/αα			116	85.4	27.8	97.6	2.4
1056	7597851	29岁	-4.2α/αα			148	78.3	25	97.59	2.41
1057	7544859	29岁				128	84.5	29.7	96.72	3.28
1058	7481859	30岁				155.6	87.1	30	97.05	2.95
1059	5719975	28岁	-3.7α/αα			119	78.1	25.1	97.46	2.54
1060	6936804	35岁				116.4	84.6	28.5	97.55	2.45
1061	6559730	25岁			17/N	105	60.7	19.1	93.1	5.55
1062	7447242	30岁				137	86.4	30.1	97.41	2.59
1063	7602384	24岁	-3.7α/αα			102	82.1	26.8	97.19	2.81
1064	7612087	29岁	--SEA/αα			132	63.7	20.5	97.52	2.48
1065	7486340	35岁				107	91.2	31.3	97.59	2.41
1066	7570973	28岁			17/N	120	64.1	20	94.68	5.32
1067	7328099	21岁				116	86.4	30.9	93.69	2.75
1068	5696862	32岁	--SEA/αα			110	65	20.7	97.84	2.16
1069	7384171	34岁				124	88.5	29.8	97.19	2.81
1070	4980339	36岁				124	90	31.7	96.93	3.07
1071	2252001	29岁				120	83.9	27.6	97.66	2.34
1072	4427637	28岁	-3.7α/αα			129	78.3	25.2	97.19	2.81
1073	5162126	39岁				120	81.7	27.4	97.42	2.58
1074	7591357	27岁				128	92.3	31.8	97.55	2.45
1075	5634719	36岁				150	89.2	30.5	97.58	2.42
1076	5395085	24岁	--SEA/αα			114	64	20.8	97.47	2.53
1077	7576086	41岁				136	94	31.3	97.48	2.52
1078	7459172	34岁				101	96.1	32.9	97.04	2.96
1079	7324131	23岁	--SEA/αα		17/N	100	65	21.2	94.84	5.16
1080	7451984	24岁	--SEA/αα		41-42/N	125	67.5	21.3	94.99	5.01
1081	7216344	28岁			41-42/N	96	61.7	19.9	94.34	5.66
1082	7594392	28岁	-3.7α/αα			123	83.6	26.5	97.55	2.45
1083	6213929	34岁			654-2/N	135	64	20.2	95.27	4.73
1084	4016946	31岁				117	87.3	29.6	97.07	2.93
1085	7313016	30岁				135.5	93	31.9	97.6	2.4
1086	4471917	31岁	-3.7α/αα			121	78.9	26.3	97.26	2.74
1087	5987218	26岁	--SEA/αα			129	63	19.6	97.69	2.31
1088	6129818	33岁				126.7	93.9	32.3	97.53	2.47
1089	4091893	35岁				129	85.1	28.7	97.57	2.43
1090	7526331	24岁		αWSα/αα		134.6	80.9	27.1	97.4	2.6
1091	3376299	30岁				100	74.2	22.8	97.53	2.47
1092	7422182	27岁				126	87.8	29.6	97.79	2.21
1093	5573923	39岁				126	91.6	30.1	97.5	2.5
1094	4956953	35岁				115	83.5	23.8	97.67	2.33
1095	7424314	26岁	--SEA/αα			90.5	70	22.3	96.3	1.08
1096	447697	31岁				85	65.5	19	97.71	2.29
1097	6977777	29岁				125	94.3	32.3	95.34	2.9
1098	4593780	38岁				112	88.1	28.9	97.59	2.41
1099	7460380	27岁			654-2/N	99.1	59.5	18.8	94.74	5.26
1100	7633343	28岁				147	87.6	28.5	97.19	2.81
1101	3527878	32岁				135	87.9	28.7	97.52	2.48
1102	7544752	32岁			41-42/N	104	65.9	21.1	94.66	5.34
1103	7559708	28岁				124	96.7	31.5	97.52	2.48
1104	4358969	32岁				128	90.7	30.6	95.68	2.93
1105	7379699	27岁	--SEA/αα			114	68.1	21.9	97.82	2.18
1106	2774757	29岁				133	82.3	28.1	97.26	2.74
1107	7244335	23岁	-3.7α/αα			130	77.4	25.3	97.44	2.56
1108	5829373	33岁	-4.2α/αα			134	80.8	26.6	97.31	2.69
1109	3804317	33岁				133	85.7	28.3	97.65	2.35
1110	7585451	28岁	-4.2α/αα			108	75.4	24.6	97.29	2.71
1111	6612832	23岁				115.2	87.8	30.7	97.1	2.9
1112	4875462	33岁	--SEA/αα			119	64.8	20.6	97.82	2.18
1113	7333939	36岁	--SEA/αα			109	68.4	21.2	97.69	2.31
1114	7635959	22岁				116	88	30.3	97.46	2.54
1115	7213009	26岁				126	88.1	30	97.51	2.49
1116	5841890	38岁				100	78.8	24.7	97.17	2.83
1117	4930412	33岁				105	92.8	31.3	97.15	2.85
1118	4485672	32岁				133	81.6	28.4	97.2	2.8
1119	87165	47岁				109	77.2	24.1	97.78	2.22
1120	7604331	30岁				161	93.9	32.6	97.09	2.91
1121	3271936	29岁				132	88.8	30.8	96.92	3.08
1122	5664870	29岁	--SEA/αα			135	68.2	20.7	97.89	2.11
1123	4249661	29岁				145	91.3	30	97.1	2.9
1124	4431165	30岁				122	96.1	31.6	97.56	2.44
1125	7583126	39岁	--SEA/αα			131.1	67.8	21.6	97.53	2.47
1126	7540647	25岁	-3.7α/αα			134	81.4	26.8	96.97	3.03
1127	5150512	35岁				140	84.4	29	97.59	2.41
1128	7564505	29岁				139	89.8	29.4	98.62	1.38
1129	5377741	23岁	-3.7α/αα			123	81.3	26.8	97.49	2.51
1130	6413780	24岁				148	90.1	29.3	97.12	2.88
1131	6258617	27岁				163	88.7	29.7	97.63	2.37
1132	7627434	33岁				163	85.5	28.8	96.94	3.06
1133	7536180	31岁				123	92	30.7	97.14	2.86
1134	7647554	26岁				124	89.7	29.6	97.6	2.4
1135	4925312	31岁				117	93	30.3	97.14	2.86
1136	4656004	27岁				138	85	30.4	97.11	2.89
1137	5954713	25岁				134	89.2	28.9	97.58	2.42
1138	7001449	27岁				121	84.4	29.6	97.55	2.45
1139	7640249	28岁				116	88.5	30.2	96.98	1.53
1140	6347023	18岁				119	80.9	26.4	97.33	2.67
1141	5762367	37岁			654-2/N	97	66.7	20.7	93.89	4.47
1142	7339272	21岁	--SEA/αα			114.9	68.8	21.8	97.65	2.35
1143	7476876	31岁				115	75.1	24.1	97.37	2.63
1144	3398687	51岁	--SEA/αα			104	66.6	20.8	97.86	2.14
1145	7162274	29岁				129	93.3	32.1	97.57	2.43
1146	4853634	36岁				135	81.6	27.3	97.76	2.24
1147	621313	37岁	--SEA/αα			131	71.4	22.4	97.38	2.62
1148	7604974	31岁				117	95.9	32.1	97.54	2.46
1149	5337336	29岁	-3.7α/αα			119	85	26.6	97.84	2.16
1150	6003875	28岁				128	81.9	26.3	97.44	2.56
1151	621673	49岁				85	67	19.3	97.83	2.17
1152	506635	43岁				81	62.6	17.7	98.22	1.78
1153	507922	48岁				78	59.1	16.6	98.36	1.64
1154	7602617	26岁				99	93	30.1	97.53	2.47
1155	6663615	41岁				126	93.4	32.2	97.39	2.61
1156	2450721	31岁				123	90.3	33	95.17	2.33
1157	5652885	36岁				109	84.1	26.6	97.52	2.48
1158	5590898	50岁				152	85.2	28.6	97.23	2.77
1159	365478	29岁				135	90	30.1	97.21	2.79
1160	5053540	32岁				118	92.2	30.7	97.12	2.88
1161	7510160	29岁				111	78.5	25.6	97.52	2.48
1162	7023516	34岁				124	91.8	30.8	97.58	2.42
1163	6152578	27岁				112	82.3	27.9	97.21	2.79
1164	7517467	26岁				109	83.9	28.7	97.54	2.46
1165	6406878	30岁	--SEA/αα			115	69.3	21.5	97.71	2.29
1166	7502364	25岁				127	88.4	30.1	97.55	2.45
1167	7594130	31岁				121	92.7	32.5	97.71	2.29
1168	7389922	26岁	--SEA/αα			147	72.6	23.4	97.43	2.57
1169	7386504	23岁	--SEA/αα			90	71	22.7	92.68	5.51
1170	4255017	32岁				129	93.2	30.1	87.89	1.95
1171	7564461	31岁				118.4	81.1	27.2	97.32	2.68
1172	7664869	25岁	-4.2α/αα			147	85.5	27.1	97.4	2.6
1173	6109206	43岁				96.4	67.5	21.5	97.63	2.37
1174	7541816	25岁				125	87.7	28.5	97.6	2.4
1175	7410314	34岁				128	95.4	30.8	97.44	2.56
1176	7428034	35岁				121.3	81.8	26.9	97.4	2.6
1177	4354755	47岁				117	93.9	31.3	96.99	3.01
1178	7684983	30岁	--SEA/αα			142	62.5	19.4	97.21	2.79
1179	2946308	31岁	-4.2α/αα		71-72/N	100	68.7	21.7	94.42	5.58
1180	7650415	25岁				130	83.7	27.5	97.6	2.4
1181	7552052	28岁				129	90.5	30.8	97.82	2.18
1182	1480376	32岁				121.3	85.8	30.5	97.3	2.7
1183	4080978	31岁				127	89	29.8	97.54	2.46
1184	7684299	47岁				153.4	88.1	30.4	97.03	2.97
1185	2741002	33岁				94.9	90.2	32	97.19	2.81
1186	6859922	31岁				119	92.6	32.5	94.31	2.98
1187	4754786	30岁				123	83.6	27.3	97.58	2.42
1188	6573212	29岁				168	89.5	30.3	96.97	3.03
1189	4517404	36岁				114	93.5	30.9	97.18	2.82
1190	7351870	31岁				107.7	75.6	24.9	97.85	2.15
1191	7683468	39岁				164.5	87.5	31.5	97.18	2.82
1192	7684119	29岁				138	88	30.1	97.47	2.53
1193	4459153	38岁				110.6	87.3	31.1	97.27	2.73
1194	7163903	32岁				111	84.8	29.6	96.91	3.09
1195	7486648	41岁	--SEA/αα			153	68.6	22.7	97.69	2.31
1196	6328561	33岁	--SEA/αα			116	68.9	21.2	97.54	2.46
1197	7660454	23岁	--SEA/αα			98	69.6	21.9	97.46	2.54
1198	7692731	29岁				162	85	28.9	97.04	2.96
1199	5854659	43岁				149.5	89.9	31.2	97.05	2.95
1200	7506612	26岁				106	85.1	27.2	97.8	2.2
1201	7516754	30岁			41-42/N	99	63.8	20.5	95.21	4.79
1202	4145306	35岁				93	72.6	22.5	98.02	1.98
1203	7703174	25岁	--SEA/αα			114	66.2	20.5	97.51	2.49
1204	7710481	23岁	--SEA/αα			128	68.4	21.1	97.41	2.59
1205	5830282	30岁				135.1	93.4	31.5	98.04	1.96
1206	5380177	33岁				88	76.7	22.7	97.9	2.1
1207	7303187	33岁				137	93.5	30.5	97.46	2.54
1208	7670312	30岁				120	83.4	25.9	97.51	2.49
1209	6941760	29岁				110	85.7	28.4	97.54	2.46
1210	6638646	31岁				138	90.7	30.5	97.62	2.38
1211	3527968	35岁				110	80	25.9	97.37	2.63
1212	7662934	30岁			654-2/N	121	62.9	20.1	94.63	5.37
1213	5074512	39岁				120.5	91.1	31	97.27	2.73
1214	7426983	27岁	--SEA/αα			123	65.5	20.8	97.7	2.3
1215	6089320	41岁				159	89.3	30.3	97.18	2.82
1216	6548152	26岁				102	85.4	29.2	97.34	2.66
1217	7559360	26岁				120	89.2	29.5	97.54	2.46
1218	7627737	29岁				123	87.4	29.9	97.59	2.41
1219	5332834	37岁				120.9	84.9	30	97.54	2.46
1220	7410463	32岁				133	83.8	28	97.24	2.76
1221	7717652	34岁			17/N	144	56.9	17.9	94.8	5.2
1222	5010382	36岁				113	90.3	30.4	97.6	2.4
1223	7615508	37岁				118	78.6	24.8	97.52	2.48
1224	4961851	41岁	--SEA/αα			139	66.3	21	97.66	2.34
1225	69264	39岁				122	94.2	32.4	94.51	1.32
1226	7711455	31岁	--SEA/αα			140	63.5	20.3	97.68	2.32
1227	4200709	28岁				125	87.4	29.1	97.11	2.89
1228	56343	30岁				117.8	83.1	29.3	95.88	2.57
1229	7725047	36岁				145	86	28.2	97.6	2.4
1230	6218405	23岁				118	85.4	30.2	97.22	2.78
1231	7603079	27岁				126	76.4	25	96.9	3.1
1232	5143048	30岁				119.6	86.1	29.3	97.89	2.11
1233	623436	24岁			654-2/N	111	61.9	20	95.45	4.55
1234	5898354	26岁	--SEA/αα			107	65.5	20.3	97.47	2.53
1235	7650765	29岁	--SEA/αα			137	69.9	22	97.23	2.77
1236	7694594	22岁	--SEA/αα			94	73.2	23.2	97.91	2.09
1237	7658195	35岁				116	85.5	26.8	97.45	2.55
1238	5161139	29岁				114.5	89.7	31.1	97.51	2.49
1239	7426425	23岁	-3.7α/αα			150	80.4	26.2	97.25	2.75
1240	1315710	28岁				123.9	91.5	31	97.08	2.92
1241	6828177	31岁				118	86.7	30.1	97.64	2.36
1242	7698607	29岁				105	81.8	26.2	97.49	2.51
1243	7709033	27岁				121.8	89.6	30.4	97.57	2.43
1244	6352048	36岁			41-42/N	100	62.9	20.4	93.05	4.36
1245	7622911	25岁	-4.2α/αα		41-42/N	107.1	63	20.4	89.48	6.89
1246	3462700	27岁				135	86.9	29	97.56	2.44
1247	1786495	27岁				128	87.9	30.9	97.2	1.44
1248	7651511	27岁	-3.7α/αα			130.4	76	25.5	97.65	2.35
1249	7728516	43岁				96	86	28.1	97.66	2.34
1250	6443379	26岁				114.4	84.4	29.3	96.76	3.34
1251	7605001	25岁	--SEA/αα			106	67.3	21.2	97.74	4.34
1252	5694616	28岁				125.1	76.8	25.9	97.11	5.34
1253	7427133	29岁				133	92.2	29.6	97.55	2.45
1254	7539332	24岁				148	75.6	24.7	97.6	2.4
1255	222095	36岁	--SEA/αα			108.7	69.5	23.1	95.45	2.45
1256	7537380	41岁				149	93.6	29.9	97.16	2.84
1257	244110	56岁	--SEA/αα			125	66	21.8	97.77	2.23
1258	5677368	28岁				118	89.5	30.2	97.35	2.65
1259	4604024	31岁				137.6	74.7	24	94.97	5.03
1260	6327978	27岁				115	94.5	31.4	97.7	2.3
1261	6458222	30岁				130.7	88.9	30.8	97.61	2.39
1262	7695886	28岁				124.1	79.5	26.6	97.19	2.81
1263	7575675	29岁				104.8	86.3	30.3	97.61	2.39
1264	3983758	35岁				115.3	88.8	30.8	97.01	2.99
1265	7631516	29岁	-4.2α/αα			117	84.4	28.1	97.59	2.41
1266	3294573	30岁	-3.7α/αα			113	88.8	28	97.38	2.62
1267	6406192	36岁				111.8	86.4	29.8	94.48	2.6
1268	6571717	27岁				128.7	92.8	31	97.57	2.43
1269	3744721	30岁				126	82.9	28	97.24	2.76
1270	7726067	30岁				118.1	88.7	31.5	97.31	2.69
1271	1621124	30岁	-3.7α/αα			129	79	25.9	97.44	2.56
1272	6250000	35岁				121	87.3	30.2	97.63	2.37
1273	4378857	24岁				122	92.1	31.1	97.55	2.45
1274	7354493	27岁				118	90.5	29.4	96.59	1.6
1275	3871166	27岁				100	69.6	22.7	87.86	2.44
1276	6767328	25岁	--SEA/αα			121	69	21.8	97.7	2.3
1277	7192515	28岁				123.3	90.8	32.2	97.08	2.92
1278	7755826	24岁			41-42/N	119	59.2	19.2	94.01	5.99
1279	3517429	37岁				112.5	84.1	29.3	97.38	2.62
1280	7614683	36岁	-3.7α/αα			112	79.6	25.7	97.48	2.52
1281	3685633	39岁				119	86.6	29.6	97.79	2.21
1282	7741391	30岁	-3.7α/αα			106.7	78.2	26.4	97.5	2.5
1283	378868	31岁				112.2	87.9	30.4	97.28	2.72
1284	2488979	31岁				116	88	30.3	97.95	2.05
1285	7443785	30岁				167	84.9	28.9	96.85	3.15
1286	3551221	38岁				108	89	30.5	97.1	2.9
1287	626081	49岁				85	67.4	20.8	97.95	2.05
1288	7642199	26岁				124	88.7	30.4	97.66	2.34
1289	3150454	30岁				106.6	89.8	30.9	97.53	2.47
1290	5409244	29岁				134.7	81.1	27.5	97.38	2.62
1291	7681075	28岁				116.1	90.9	32.1	96.21	2.45
1292	6640822	32岁	-3.7α/αα			105	85.2	27.7	97.39	2.61
1293	7745399	21岁				123.9	88.2	30.5	97.54	2.46
1294	7748338	25岁	--SEA/αα			133.3	68.4	22.3	97.48	2.52
1295	7770331	40岁			-28/N	132	68.1	21.7	91.73	6.15
1296	1132529	41岁			41-42/N	78	60	17.9	95.16	4.84
1297	7714170	36岁			-28/N	139	78	24.2	94.4	5.6
1298	1619262	35岁				127	89.8	29.4	97.74	2.26
1299	333178	33岁				129	78.6	26.6	96.45	3.55
1300	7718544	27岁	-3.7α/αα			117	79	26.4	97.26	2.74
1301	102876	36岁				127	87.5	30	97.12	2.88
1302	5811185	30岁			654-2/N	103	67.7	21.5	95.54	4.46
1303	626897	50岁				80	77.8	24	97.83	2.17
1304	151046	46岁				90	77.8	24.1	97.63	2.37
1305	7744553	34岁				64	63.5	17.8	97.51	2.49
1306	7416694	31岁				123	95.8	31.9	97.36	2.64
1307	5903185	25岁	-3.7α/αα			107	84.2	27.3	97.51	2.49
1308	7589053	28岁				135	88.8	30.8	97.76	2.24
1309	2552969	29岁				121	93.1	31	97.62	2.38
1310	7016757	28岁				156	82.9	29.1	97.14	2.86
1311	7053761	34岁	--SEA/αα			140	70	21.3	97.71	2.29
1312	3942793	38岁				104	91.5	31.7	98.58	1.42
1313	3419100	40岁				141	90.4	30.7	97.72	2.28
1314	6562560	31岁				116	80.3	26.6	97.07	2.93
1315	2981583	39岁				66	68.1	18.3	98.15	1.85
1316	7762232	34岁				104	80.3	23.6	98.07	1.93
1317	7668602	28岁				145	83.8	28.4	96.25	3.75
1318	4573298	38岁	-3.7α/αα			104	87.8	27.6	97.03	2.97
1319	3418775	31岁	--SEA/αα			110	69.8	22.3	96.24	2.51
1320	4575275	27岁		αWSα/αα		159.4	81.5	27.6	97.24	2.76
1321	5709323	26岁				122.9	90.4	30.5	97.65	2.35
1322	7754963	29岁				114	91.1	29.9	97.05	2.95
1323	7428909	28岁				129	84.3	29	97.6	2.4
1324	4067440	35岁				108	85.6	29.4	97.3	2.7
1325	4533206	31岁				115	80.3	26.6	97.45	2.55
1326	5103101	27岁			-28/N	99	71.9	22.7	94.4	5.6
1327	7727637	25岁				119	89.5	29.8	97.52	2.48
1328	7790591	30岁				119	90.4	30.2	97.23	2.77
1329	325169	55岁				76	100	41.1	97.36	1.44
1330	2061098	29岁			17/N	98	63.3	20.8	93.18	5.69
1331	7522712	27岁				125	96.4	32.1	97.47	2.53
1332	4465869	35岁				130.7	87.7	29.5	97.62	2.38
1333	7371817	27岁				130.3	87.3	30.4	97.53	2.47
1334	7418586	24岁				125.2	94.4	32.2	97.54	2.43
1335	7696448	26岁				129	81.6	28.5	97.18	2.82
1336	7088937	30岁				133	77.8	25.2	97.39	2.61
1337	5765889	25岁	-3.7α/αα			133	81.7	27.7	97.31	2.69
1338	502105	39岁				150	85.4	27.7	97.16	2.84
1339	4784208	41岁				162	83	27	97.2	2.8
1340	4665374	27岁				118	79.3	27.4	97.56	2.44
1341	4965897	35岁				133	88.1	29.4	97.6	2.4
1342	7669857	24岁				134	89.3	29.8	97.5	2.5
1343	4102861	27岁				149	86.5	30	97.27	2.73
1344	7694742	38岁				112	82.2	26.2	97.75	2.25
1345	7522159	33岁				127	90.6	30.5	97.17	2.83
1346	7786356	32岁				152	86.4	28.8	96.6	3.4
1347	7802137	37岁	-3.7α/αα			135	78.5	24.9	97.44	2.56
1348	3935935	28岁				110	80	25.2	98.1	1.9
1349	2014019	32岁				121.3	91.9	31.8	97.07	2.93
1350	7625396	33岁				87	78.2	23.7	97.73	2.27
1351	7715980	25岁				165	88	30.4	96.66	3.34
1352	4157455	27岁				106.8	87.9	29.4	97.24	2.76
1353	7688361	33岁				124	91	31.9	97.51	2.49
1354	7556963	28岁			654-2/N	137	58.4	18.6	94.84	5.16
1355	7579845	34岁				125.1	84.5	27.9	97.52	2.48
1356	7792780	35岁				158	85.5	28.7	96.91	3.09
1357	7779307	21岁	-3.7α/αα			117	81.9	27.8	97.46	2.54
1358	4978816	26岁	--SEA/αα			108	64.2	21	97.84	2.16
1359	628305	50岁			17/N	83	62.3	19.1	93.84	6.16
1360	628473	24岁				52	65.3	17.9	97.79	2.21
1361	7528906	32岁				82	67.5	19.2	97.93	2.07
1362	7129828	30岁				150	87	29.6	97	3
1363	5561217	34岁				125	92.6	31.7	97.68	2.32
1364	2951375	27岁	-3.7α/αα			119	83.3	26.8	97.33	2.67
1365	7812699	48岁	--SEA/αα			115	71.4	21.4	97.67	2.33
1366	7514094	30岁	--SEA/αα			102	65.1	20.2	97.34	2.66
1367	628518	34岁				98	84.2	28.7	97.3	2.7
1368	6403181	31岁	--SEA/αα			137	66.1	20.9	97.49	2.51
1369	7740765	37岁	-3.7α/αα			122.1	85.4	28	97.64	2.36
1370	6795079	29岁				129	86.8	29.5	96.95	3.05
1371	7801789	36岁				160	92.2	32.1	97.4	2.6
1372	7671120	30岁				117	92.9	31	95.21	2.9
1373	6544975	27岁				122	81.2	27.7	97.35	2.65
1374	7726337	29岁				151	89.6	29.6	97.04	2.96
1375	104007	46岁				88	68.5	23.7	98.15	1.85
1376	5527979	25岁			41-42/N	101	61.8	19.3	93.94	6.06
1377	727541	37岁				141	92.5	30.3	97.62	2.38
1378	7210146	36岁		αCSα/αα		114	78.9	25.3	98.15	1.85
1379	1561461	39岁				115	79.5	26.1	97.41	2.59
1380	7794066	31岁				115	89.9	30.7	97.04	2.96
1381	5385722	23岁				120	87.7	29.6	96.95	3.05
1382	7673697	30岁				109	80.1	25.5	97.38	2.62
1383	4044986	38岁				113	89	29.7	96.84	3.14
1384	7650390	29岁				57	62.7	16	97.84	2.16
1385	7756815	31岁				152.4	83.4	28.4	97.03	2.97
1386	7819792	29岁			654-2/N	126	61	19	94.67	5.33
1387	6211837	30岁				117	91.3	31.8	97.27	2.73
1388	7821277	20岁				140	86.9	28.7	97.94	2.06
1389	7291235	27岁				97	77.4	23.6	97.57	2.43
1390	4816890	31岁				120.4	89	30.5	97.2	2.8
1391	4308620	31岁	-3.7α/αα			123	80	25.2	97.54	2.46
1392	2175963	41岁				141	85.7	29.7	95.6	2.87
1393	255451	37岁	--SEA/αα			142	64.8	20.4	97.86	2.14
1394	7072943	25岁				136	98.4	31.7	97.61	2.39
1395	629729	46岁	--SEA/αα			107	63.1	20.2	97.65	2.35
1396	6118275	27岁				148	87.5	29.9	97.32	2.68
1397	5880894	25岁				119	87.3	30.2	96.81	3.19
1398	7743127	39岁				132	83.3	28.7	97.11	2.89
1399	4080810	36岁				115	92.7	31.2	97.72	2.28
1400	1109181	36岁				108.6	91	30.9	97.58	2.42
1401	7276097	32岁				119.5	86.8	30.5	97.5	2.5
1402	4338278	30岁				132	85.4	28.3	97.12	2.88
1403	6257193	36岁				111	76.8	23.9	97.44	2.56
1404	7782086	21岁				141	90.8	31.7	97.27	2.73
1405	6885330	27岁				123	95.1	32	94.48	2.73
1406	2155332	27岁				116.5	89	31.5	97.6	2.4
1407	6842300	32岁	--SEA/-α3.7	无扩增产物		79	69.1	18.9	87.89	1.28
1408	2950675	31岁				135	89.6	30.5	97.51	2.49
1409	3882754	27岁	--SEA/αα			118	66.7	21.5	97.53	2.47
1410	2313304	35岁				120	80.4	26.1	97.49	2.51
1411	5854902	26岁				135	86.4	28.7	97.76	2.24
1412	7509688	24岁				114.5	88.7	29.8	96.82	3.18
1413	7815417	31岁	--SEA/αα			118	65.2	21.1	97.54	2.46
1414	3151335	42岁				138	90.2	30.8	97.22	2.78
1415	6017001	40岁				121	91.9	32.6	96.87	3.13
1416	7696707	31岁				114.7	87.7	29	97.53	2.47
1417	3658900	31岁				119	88.1	29.5	97.53	2.47
1418	1059080	31岁				130.5	88.8	29.7	97.55	2.45
1419	7569198	30岁				121	97	32.9	94.64	2.56
1420	7810753	37岁				123	88	30.7	97.2	2.8
1421	356535	29岁				115.7	90.3	30.4	94.68	3.03
1422	6479231	42岁				139	91.8	30.9	97.19	2.81
1423	508128	48岁				82	72	19.3	97.98	2.02
1424	5191370	33岁				122	89.9	29.5	97.22	2.78
1425	7863869	41岁				103	66.7	19.1	98.03	1.97
1426	7718815	26岁			71-72/N	92	66.8	22	88.27	5.63
1427	7763390	25岁				61	53	13.6	98.1	1.9
1428	6349704	25岁				100	71.2	21.3	97.77	2.23
1429	6015136	39岁				114	90.1	30.6	97.03	2.97
1430	6310752	30岁				143	82.4	27.7	97.34	2.66
1431	5342285	23岁	-3.7α/αα			126	76.6	25.4	97.38	2.62
1432	4773890	33岁				127	90.1	31.5	97.65	2.35
1433	4557123	32岁				118	87	30.1	97.75	2.25
1434	4844544	32岁				114	86	27	97.17	2.83
1435	4503354	26岁				121	98.4	32.3	97.11	2.89
1436	7541112	32岁				97	78.2	25.5	97.42	2.58
1437	3985813	36岁				113	90.7	29.9	97.02	2.98
1438	7867258	33岁			17/N	130	61.5	18.9	94.19	5.81
1439	4269468	25岁				159	78.8	27.9	96.69	3.31
1440	7457092	27岁				98	73.9	23.4	97.77	2.23
1441	7054183	27岁				119	89.2	29.2	97.02	2.98
1442	5683867	27岁				127	92.2	33	94.73	2.66
1443	7682290	36岁				126	90.3	31.2	97.66	2.34
1444	7847671	32岁				113	92.8	30.3	97.18	2.85
1445	4480046	34岁				73	67.7	19.5	97.81	2.19
1446	5557430	32岁				123	90.2	29.5	97.03	2.97
1447	53754	32岁				125	86.2	28.2	97.6	2.4
1448	7825434	22岁				126	85.3	30.4	97.27	2.73
1449	631712	40岁				109	80.6	25.8	97.96	2.04
1450	7232114	29岁				113	89.3	30.3	97.68	2.32
1451	5146143	26岁				109	88.7	29.4	97.3	2.7
1452	7830942	35岁	-3.7α/αα			125	88.8	29.1	97.55	2.45
1453	4661611	35岁				129	87.8	29.7	97.38	2.62
1454	5583553	27岁				116	92.1	30.6	97.31	2.69
1455	4587432	30岁				136	94.6	31.7	97.14	1.18
1456	4309337	26岁				122	89.7	30	97.52	2.48
1457	600365	38岁				108	86.7	29.3	97.16	2.84
1458	633030	40岁				111	62.5	20.4	94.71	5.29
1459	7907124	35岁				158	89.2	29.9	96.98	3.02
1460	6937502	32岁				118	84.8	28.4	94.2	3.41
1461	7852872	18岁				133	80	27.1	97.11	2.89
1462	632696	18岁			-28/N	104	66.3	19.6	95.26	4.74
1463	7860556	26岁				112	93.5	31.7	97.11	2.89
1464	7836908	25岁				130	95.3	32	97.14	2.96
1465	6317568	35岁				124	88.2	29.9	97.38	2.62
1466	6107152	29岁				121	87.4	30	97.17	2.83
1467	5898854	32岁				130	89.5	29.7	97.22	2.78
1468	1385613	34岁	-3.7α/αα			104	70.7	22.1	97.71	2.29
1469	7684619	42岁				122	88.8	30.3	97.02	2.98
1470	3763353	28岁				124	95.8	32.4	97.53	2.47
1471	7761949	26岁				125	82.7	29.2	96.74	3.26
1472	30553	34岁	-3.7α/αα		654-2/N	128	66.4	21	95.19	4.81
1473	3050274	32岁				88	71.1	21.7	97.55	2.45
1474	7692990	26岁				110	85.9	26.6	97.69	2.31
1475	6411465	26岁				115	86.8	29.7	97.16	2.84
1476	4735396	33岁				103	82.3	25.3	97.2	2.8
1477	7452419	27岁				103	79.1	23.6	97.52	2.48
1478	4731799	28岁				108	93.9	29.8	97.25	2.75
1479	2398317	33岁				155	89.6	30.9	96.98	3.02
1480	634394	19岁	--SEA/αα	αCSα/αα		41	77.4	22	98.69	1.31
1481	507941	49岁				64	71	18.6	97.97	2.03
1482	7935226	49岁	--SEA/αα			139	73.1	23.4	97.13	2.87
1483	7749796	23岁				117	86.4	29.5	97.58	2.42
1484	5331995	27岁				124	86.5	30	92.06	2.73
1485	1591839	32岁				120	95.4	32.2	97.18	2.82
1486	5477613	40岁				94	67.6	18.8	97.87	2.13
1487	5459497	23岁				122	74.5	24.6	94.45	5.55
1488	7676965	22岁	--SEA/αα			115	68.2	21.9	97.46	2.54
1489	6795978	26岁				125	85.8	29.5	97.6	2.4
1490	4755988	27岁			41-42/N	103	59	19.3	94.45	5.55
1491	6859386	23岁				96	69.6	20.6	98.16	1.84
1492	5229007	37岁				113	93.8	31.9	97.19	2.81
1493	6042187	24岁				138	79.6	27.1	96.68	3.32
1494	266342	36岁			654-2/N	114	59.1	18.7	94.46	5.54
1495	7937590	20岁				162	86.1	28.1	96.63	3.37
1496	7931448	28岁	--SEA/αα			105	64.6	19.7	97.73	2.27
1497	4023540	25岁				135	85	29.8	97.62	2.38
1498	7555811	26岁	-3.7α/-3.7α	无扩增产物		130.3	71.1	23.1	97.46	2.54
1499	3977798	30岁				132	81.8	28.6	97.28	2.72
1500	7934282	33岁				113	96.5	30.5	97.69	2.31
1501	7912902	26岁				128	92.3	30.9	93.57	2.74
1502	7947964	31岁				149	85.6	27.2	90.99	2.47
1503	7812956	40岁				115	92.8	30.7	97.3	2.7
1504	7537320	30岁				116	85.1	28.7	97.53	2.47
1505	6370247	30岁				138	80.9	28	97.41	2.59
1506	7831980	29岁				130	87.1	28.9	97.54	2.46
1507	4498481	36岁				122	81.1	26.5	97.49	2.51
1508	6564925	30岁				129	84.7	27	97.57	2.43
1509	195685	35岁				100	67.2	20.6	97.64	2.36
1510	6236299	30岁				114	81.5	26.7	97.76	2.24
1511	7043359	27岁				119	77.2	24.7	97.09	2.91
1512	7912167	26岁				118	94.4	31.4	96.97	3.03
1513	7949620	26岁	--SEA/αα			141	68.6	21.5	97.05	2.95
1514	7505430	26岁				120	88.3	29.3	97.57	2.43
1515	7912455	28岁	--SEA/αα			100	68.3	21.4	97.52	2.48
1516	7969832	43岁		αWSα/αα		149	85.1	28.8	97.32	2.68
1517	4385197	24岁				129	71	23.2	97.36	2.64
1518	7834871	32岁				123	90.3	29.9	97.69	2.31
1519	7937171	25岁	--SEA/αα			108	67.8	21.7	97.3	2.7
1520	7743702	28岁				128	90.3	30.3	97.15	2.85
1521	7524985	28岁				123	95.7	33.4	95.85	1.44
1522	7961200	32岁			-28/N	119	78.5	24.8	93.95	5.02
1523	4488912	34岁				153	81.7	28.3	96.76	3.24
1524	5225482	37岁				117	93.1	31	97.4	2.6
1525	358906	53岁				62	87.9	28.8	97.72	2.28
1526	7817820	27岁				127	90.1	30.5	97.48	2.52
1527	5246692	33岁				120	90.2	31.1	96.65	3.15
1528	7752742	27岁				103	90.2	30.5	97.26	2.74
1529	3445328	32岁				130	88.1	30.2	97.53	2.47
1530	7830623	26岁				133	88.4	29.2	97.12	2.88
1531	7070995	28岁				164	81.8	27.9	97.44	2.56
1532	4348943	33岁	-4.2α/αα			112	82.9	27	96.5	2.46
1533	507288	42岁				77	67.2	19.1	97.63	2.07
1534	7971370	43岁				103	71.5	21.1	98.07	1.93
1535	5130248	33岁				120	87.5	28.8	97.55	2.45
1536	7890871	30岁				120	88.5	28.7	97.69	2.31
1537	4847857	35岁				116	81.3	27.2	97.37	2.63
1538	6900623	27岁				162	90.4	30	97.41	2.59
1539	5919225	31岁				161	85.3	29	97.57	2.43
1540	3433974	32岁				101	76.8	23.2	98.33	1.67
1541	4160091	34岁				115	93.7	31.5	97.07	2.93
1542	6294494	29岁				128	92.6	31.5	94.82	2.13
1543	3942446	42岁				161.5	87.9	29.7	97.27	2.73
1544	7788802	40岁				131.7	93	30.5	97.26	2.74
1545	7855942	24岁	-3.7α/αα			120	80.7	26.7	97.23	2.77
1546	7851808	31岁				125	86.7	29.1	97.35	2.65
1547	5207950	36岁				134	90.4	31.3	97.12	2.88
1548	6208818	30岁			654-2/N	87	61.9	20.2	95.68	4.32
1549	7902539	27岁				135	87.1	29.9	94.2	3.13
1550	7974083	32岁	-3.7α/αα			135	81.5	26.1	97.75	2.25
1551	7775053	26岁				119	80.9	27	97.46	2.54
1552	7812272	24岁				115	82.5	25.1	97.59	2.41
1553	7965585	25岁				111	66	21.2	97.56	2.44
1554	632538	39岁			654-2/N	105	65.2	21	95.21	4.79
1555	7930522	27岁				98	78.9	24.6	97.71	2.29
1556	7901581	32岁	--SEA/αα			113	66.8	21.1	97.9	2.1
1557	7832835	36岁			-28/N	144	68.6	22	94.26	5.74
1558	6117403	29岁	--SEA/αα			111	62.3	19.7	97.45	2.55
1559	354034	38岁		αCSα/αα		96	95.5	31	98.1	1.9
1560	8003363	29岁				106	89.7	30.5	97.12	2.88
1561	7160432	32岁				118	82.2	28	97.08	3.01
1562	5317498	27岁	--SEA/αα			115	67	21.3	97.7	2.3
1563	5995631	26岁				172	88.2	30.3	97.06	2.94
1564	7879998	26岁				104	75.2	24.1	97.34	2.66
1565	7742504	40岁				150	90.6	31.2	96.96	3.04
1566	6414282	30岁			-28/N	126	71.9	22.7	91.05	6.03
1567	7993422	29岁	--SEA/αα		41-42/N	146	73.2	22.3	94.6	5.4
1568	3965471	37岁				122	90.8	31.1	97.62	2.38
1569	7969658	33岁				105	92.9	31.1	97.7	2.3
1570	7621185	31岁				150	91.4	29.5	97.12	2.88
1571	5858359	30岁				130	86.8	27.8	97.37	2.63
1572	3516992	28岁				119	76.1	24.7	97.46	2.54
1573	6975084	43岁				148	86.3	28.5	97.14	2.86
1574	7254482	30岁	-3.7α/αα			144	79.3	26.1	97.39	2.61
1575	6317238	26岁			17/N	90	64.9	19.6	93.25	5.29
1576	7601062	35岁	--SEA/αα			101	69	22.2	97.51	2.52
1577	7903526	28岁				124	92	31.2	98.58	1.42
1578	1291016	33岁				122	91.8	31.2	97.59	2.41
1579	7915791	27岁				120	85.8	28.4	97.63	2.37
1580	7515715	27岁				132	99.3	31.4	63.34	2.2
1581	8012881	27岁				128	95.9	29.2	97.71	2.29
1582	7329714	30岁				111	79.5	25.5	97.61	2.39
1583	7932884	27岁				122	84.6	29.3	98.54	1.46
1584	4634867	35岁				123	91.7	31	97.64	2.36
1585	7767702	36岁				122	84.4	26.4	97.13	2.87
1586	7893654	22岁				139	91.2	36.9	97.61	2.39
1587	4485157	29岁				131	86.3	30.4	97.51	2.49
1588	6750475	22岁				119	89.2	29.8	96.95	3.05
1589	6334934	43岁	--SEA/αα			139	68.4	21.4	96.95	3.05
1590	5362156	34岁				136	87.1	30.2	97.51	2.49
1591	2804165	32岁				134	91.1	30.5	97.13	2.87
1592	2027739	33岁				110	91.7	29.4	97.82	2.18
1593	6236603	26岁				103	78.3	25.4	97.11	2.89
1594	637296	21岁			654-2/N	92	60.7	21.1	94.9	5.1
1595	7122845	33岁				101	74.2	23.5	97.65	2.35
1596	7883766	27岁				109	87.2	26.8	97.31	2.69
1597	5260041	26岁				141	91.7	31.6	97.52	2.48
1598	6811315	33岁				125	88.4	28.4	97.51	2.49
1599	637290	22岁	--SEA/αα	αCSα/αα		64	79.6	19.8	97.26	2.74
1600	7190880	31岁		αQSα/αα		131	79.4	24.8	97.39	2.61
1601	7978689	37岁	--SEA/αα			138	68.9	21.3	97.55	2.45
1602	3474704	37岁				124	84.6	28.4	97.65	2.35
1603	7884976	30岁				113	93.3	31.7	97.66	2.34
1604	4220754	26岁				161	86	29.8	97.02	2.98
1605	4389172	28岁				122	79.1	25.2	97.71	2.29
1606	7476378	26岁				134	78.5	25.5	97.22	2.78
1607	2349797	30岁			41-42/N	98	63.8	20.4	94.89	5.11
1608	5577983	35岁				152	83.7	28.5	97.13	2.87
1609	7812530	29岁				146	85.7	28.6	97.58	2.42
1610	3614418	27岁				133	88.5	31.1	91.75	1.49
1611	7847532	27岁				110	98.2	32.8	94.42	2.52
1612	8024100	22岁	--SEA/αα			107	70.7	21.7	98.04	1.96
1613	7828537	24岁				116	80	26.6	97.36	2.7
1614	2462608	35岁				133	91.1	30.4	97.61	2.39
1615	5812682	29岁				115	78.2	25.9	97.25	2.75
1616	7842013	26岁				123	91.6	31.2	97.52	2.48
1617	5860495	28岁			654-2/N	94	60.6	19.1	94.86	5.14
1618	112798	44岁			654-2/N	71	67.4	20.6	95.02	4.98
1619	3250657	30岁				130	91	31.6	96.92	3.08
1620	7768358	28岁	--SEA/αα			129	69.3	21.9	97.65	2.35
1621	2293701	37岁				119	92.3	30.4	97.38	2.62
1622	7932731	26岁				128	94.1	31.5	96.99	3.01
1623	4955950	39岁				126	86.1	27.9	97.44	2.56
1624	6133889	25岁				112	81.9	27	97.46	2.54
1625	7931810	24岁				136	92.6	29.6	97.55	2.45
1626	4751007	38岁				148	85.9	29.8	97.38	2.62
1627	7885053	28岁			-28/N	121	72.3	23.9	93.53	5.34
1628	7916027	29岁				135	98.9	30.9	97.64	2.36
1629	5121416	32岁				127	86.7	29.5	97.68	2.32
1630	7797277	24岁				123	73.3	23.1	97.58	2.42
1631	1218495	34岁				119	90.9	30.2	97.29	2.71
1632	7949401	32岁				80	75.7	22.9	97.39	2.61
1633	7880869	23岁	--SEA/αα			111	67.6	22.5	97.9	2.1
1634	5620524	42岁				129	90.1	31.9	97.01	2.99
1635	5253425	35岁				123	91.7	30.9	97.53	2.47
1636	2558634	38岁				134	86.6	29.5	97.26	2.74
1637	6738465	25岁				107	92.8	30.8	97.4	2.6
1638	466294	27岁				96	78.2	23.5	62.34	2.5
1639	7494188	27岁				133	88	29	97.15	2.85
1640	4378765	31岁				144	88.7	30.2	97.59	2.41
1641	5048900	25岁	-3.7α/αα			106	87.8	27.6	97.4	2.6
1642	6616437	30岁				129	100.3	33.7	92.75	2.53
1643	6549787	34岁				125	85.2	29.3	97.51	2.49
1644	7815003	25岁	-4.2α/αα			109	78.1	25.4	75.98	1.62
1645	6829186	27岁	-4.2α/αα			143	83.9	26.8	97.69	2.31
1646	7545039	36岁				98	81.9	25	97.46	2.54
1647	7485416	27岁				130	96.4	31.1	97.42	2.58
1648	8063993	41岁				89	90.8	29.4	97.27	2.73
1649	267354	36岁				119	91.3	30.4	97.56	2.44
1650	7975064	22岁	--SEA/αα			144	67.1	20.9	97.49	2.51
1651	5299842	32岁				111	91.1	28.2	97.54	2.46
1652	6836808	28岁				124	95.6	32.2	97.44	2.5
1653	1516951	35岁			41-42/N	127	57	17.6	94.07	5.93
1654	4829376	37岁				133	89.4	30.8	97.58	2.42
1655	7736352	31岁				106	98.3	30.4	97.77	2.23
1656	6351978	26岁				109	84.2	26.1	97.2	2.8
1657	7241679	30岁				130	93.5	31.5	97.6	2.4
1658	8031124	42岁				61	61.1	15	98.25	1.75
1659	4873839	29岁				116	84	26.1	97.6	2.4
1660	7906548	32岁				136	95.4	32.8	96.12	1.47
1661	7897037	37岁				126	90.6	31	97.59	2.41
1662	4581817	36岁				121	95.4	30.9	97.53	2.47
1663	7309966	26岁	--SEA/αα			117	67.5	21.6	97.56	2.44
1664	4933345	28岁				132	88.1	30.7	96.25	2.54
1665	8067449	35岁	--SEA/αα			135	67	21.3	97.65	2.35
1666	3337672	29岁			654-2/N	128	62.7	19.3	94.38	5.62
1667	7776845	29岁				126	88.8	30	96.56	2.26
1668	7570406	28岁				140	96.7	31	97.51	2.49
1669	7898306	28岁				122	95.1	31.2	97.92	2.08
1670	4553350	36岁				115	84.7	28.7	97.4	2.6
1671	8084248	32岁				162	83.1	29.1	97.15
1672	7979566	37岁				131	90.6	30	97.11	2.89
1673	4452049	25岁				119	88.9	30.8	93	5.51
1674	3830136	28岁				138	86.4	29.4	97.81	2.19
1675	7989821	26岁				128	91.8	30.9	97.52	2.48
1676	4375730	36岁				111	85.2	26.9	97.24	2.76
1677	7243854	24岁				112	93	30.1	96.3	2.42
1678	4595897	40岁				117	84.6	28.2	97.34	2.66
1679	7883070	33岁				131	85.7	29.6	97.13	2.83
1680	7974042	33岁				129	83.9	26.7	97.44	2.56
1681	3983379	29岁				116	84.5	26.1	97.58	2.42
1682	469002	38岁				115	89.9	29.8	96.69	3.31
1683	7841475	24岁				115	89.6	30.7	96.35	3.65
1684	6985114	28岁				140	89.6	31.1	97.51	2.49
1685	2984356	35岁				112	93.5	30.4	97.22	2.78
1686	7706205	26岁	-3.7α/αα			118	83.8	27	98.08	1.92
1687	7336973	24岁				119	91	31.6	97.67	2.33
1688	7929818	36岁				112	91.6	31.5	94.86	2.91
1689	242544	31岁				101	72.8	21.1	98.1	1.9
1690	239279	39岁	--SEA/αα			111	68.6	21.6	97.83	2.17
1691	5766676	28岁				104	79.5	24	97.58	2.42
1692	8010653	41岁				155	94	30.2	97.26	2.74
1693	5193698	38岁	--SEA/αα			129	66.6	20.3	98.02	1.98
1694	4688354	34岁				113	93.5	29.6	97.33	2.67
1695	6222606	28岁				140	85.4	27.6	97.03	2.97
1696	5111888	29岁	--SEA/αα			92	68	21.5	98.1	1.9
1697	8074187	31岁			654-2/N	132	63	20	93.42	5.46
1698	5220528	40岁				128	89.8	30.5	96.94	3.06
1699	5982185	30岁				121	98.4	32.9	97.44	2.56
1700	8060429	25岁			654-2/N	145	61.3	18.6	94.71	5.29
1701	6030809	33岁				131	86.4	32.3	97.11	2.89
1702	3044840	39岁				136	89.5	29.2	61.97	2.67
1703	3567068	31岁				94	81.4	24.6	97.53	2.47
1704	8098828	29岁				106	64.3	20.1	97.75	2.25
1705	8101068	32岁	-3.7α/αα			137	83.1	26.6	97.15	2.85
1706	4728016	30岁				122	91.7	29.8	97.76	2.24
1707	8062368	29岁			-28/N	124	74.4	24	92.58	5.28
1708	8077388	23岁				100	87.3	30.2	97.59	2.41
1709	7948775	25岁				144	94.2	31	98.04	1.96
1710	5773943	26岁				122	85.8	27.5	97.51	2.49
1711	7737013	26岁				124	92	30.2	97.52	2.48
1712	499982	37岁				137	85.3	28.8	96.9	3.1
1713	5120315	28岁				120	87.3	30.4	95.79	2.97
1714	7952193	34岁				107	80.7	26.5	97.41	2.59
1715	8061009	32岁				125	90	28.4	97.54	2.46
1716	7936539	31岁				131	88.4	29.2	97.58	2.42
1717	6597574	31岁				136	83.9	25.8	97.64	2.36
1718	6753497	26岁	-3.7α/αα			102	81.3	27.3	97.5	2.5
1719	7931727	37岁				121	85.4	28.9	97.19	2.81
1720	8121042	29岁				114	92.4	28.9	97.2	2.8
1721	3970821	30岁				129	92.8	30.9	97.55	2.45
1722	5883411	34岁				92	67.9	19.5	97.71	2.29
1723	8046373	23岁	--SEA/αα			108	72.3	21.9	97.59	2.41
1724	8045793	32岁				139	86.7	29	97.65	2.35
1725	7243243	29岁	-4.2α/αα			114	80.4	26.3	97.2	2.8
1726	7947598	39岁				123	90.3	30.8	97.39	2.61
1727	7152063	27岁				115	89.9	30.6	97.52	2.48
1728	6753387	30岁				139	84.6	29.4	97.08	2.92
1729	5977723	29岁			-28/N	112	68.5	21.8	92.89	5.66
1730	642534	24岁	--SEA/αα	αCSα/αα		78	81.2	21.6	90.81	1.07
1731	5505036	31岁				117	87.7	29.5	97.52	2.48
1732	2757075	33岁				116	96	33.4	94.45	2.53
1733	6702224	33岁				108	89.7	30.9	97.53	2.47
1734	7863019	29岁				123	93.1	31.2	97.54	2.46
1735	7357102	30岁				146	88.8	29.8	98.55	1.45
1736	1318818	29岁				129	88.1	30	97.51	2.49
1737	642124	54岁			17/N	60	65.1	21.4	93.71	4.08
1738	7180782	28岁	--SEA/αα			101	66.5	21.7	97.74	2.26
1739	642500	37岁				99	77.3	24.1	97.65	2.35
1740	5241194	29岁				120	94	31.1	97.53	2.47
1741	7977785	32岁				123	87.3	29.9	97.56	2.44
1742	7188921	25岁				157	80.4	28.5	97.64	2.16
1743	6062214	29岁				132.4	86.2	31.1	97.1	2.9
1744	7888352	48岁				129	88.3	29.7	96.89	3.11
1745	6554605	30岁				133	94.9	32.3	97.66	2.34
1746	5146313	35岁				124	89.4	28.4	97.51	2.49
1747	6716473	29岁				141	93	31.8	97.83	2.17
1748	3462733	36岁				115	84.6	28.5	97	3
1749	5428669	25岁				129	87.9	28.5	97.57	2.43
1750	506377	49岁	--SEA/αα			109	63	19.5	95.3	2.19
1751	5068895	28岁				120	90.6	30.2	97.54	2.46
1752	8073255	36岁		αCSα/αα		145	77.5	25.8	98.21	1.79
1753	7939393	40岁				104	75.3	23.1	97.36	2.64
1754	8087501	23岁				139	94	30.9	97.73	2.27
1755	7938099	29岁				136	91.6	30.6	97.06	2.94
1756	6546530	27岁				127	88.8	28.9	97.15	2.15
1757	4957698	32岁				133	87.5	31.9	96.77	3.23
1758	7947033	31岁			43/N	117	61.3	19.3	92.38	7.62
1759	7936083	34岁		αWSα/αα		115	76.7	24.8	97.32	2.68
1760	6091561	33岁			-28/N	125	70.9	22.8	94.66	5.34
1761	8107715	30岁				137	85.4	28.9	97.55	2.45
1762	6940497	32岁				132	89.1	31.2	97.84	2.16
1763	6614694	33岁				142	83.1	29	97.31	2.69
1764	6596723	24岁				110	88.8	30	97.15	2.85
1765	8069571	23岁				129	92.1	29.9	97.72	2.28
1766	8121373	18岁		αWSα/αα		111	92.8	29.5	97.6	2.4
1767	6744885	29岁				126	92.2	30.7	97.5	2.5
1768	7240039	35岁				128	88.7	31.4	97.54	2.46
1769	7985277	28岁		αCSα/αα		116	88	30.2	98.36	1.64
1770	5751521	29岁				130	91.1	29.6	97.23	2.77
1771	3677304	32岁				105	75.7	24.5	97.27	2.73
1772	7419801	31岁				138	94	30.7	97.55	2.45
1773	8106427	27岁			-28/N	154	70.2	22	94.12	5.88
1774	186501	32岁				119	89.4	30	97.51	2.49
1775	4490357	32岁				142	94.4	29.7	96.04	2.07
1776	5816282	28岁				99	75.8	21.4	98.19	1.81
1777	8101855	29岁				143	86.5	27.6	97.59	2.41
1778	1422890	29岁				121	86.6	28.5	97.51	2.49
1779	8070709	38岁				158	90.4	29.6	97.22	2.78
1780	4811483	28岁				132	100.3	33.8	96.76	3.24
1781	5146313	35岁				124	89.4	28.4	97.51	2.49
1782	7882578	29岁				136	85.2	28.8	96.86	3.14
1783	8065268	25岁				130	89.3	30.4	97.53	2.47
1784	7374813	31岁	-3.7α/αα			136	88.6	31.6	93.93	3.22
1785	1086788	35岁				116	93.7	30.4	97.55	2.45
1786	6431036	27岁				143	93.7	30	97.59	2.41
1787	4870971	35岁				119	93.2	30.1	97.02	2.98
1788	7899398	24岁				134	89.6	29	97.6	2.4
1789	7998522	35岁				122	92.7	31.8	96.87	3.13
1790	2541627	31岁				145	92.8	31.5	96.48	2.43
1791	8037761	34岁				119	95	31.4	97.52	2.48
1792	7111772	25岁				137	86.8	29.7	97.37	2.63
1793	550874	32岁				125	86.9	28.3	97.61	2.39
1794	8040123	28岁	--SEA/αα			133	68.6	21.2	97.68	2.32
1795	6411681	36岁	-3.7α/αα			117	86.2	29.4	97.45	2.55
1796	8125895	36岁				121	89.9	29.9	98.17	1.83
1797	4574418	25岁				147	91.1	31	94.93	2.61
1798	7385506	28岁				118	84.4	28.3	97.52	2.48
1799	2160515	31岁	--SEA/αα			135	68.5	21.1	97.53	2.47
1800	6428829	26岁	--SEA/αα			101	71.7	21.7	97.72	2.28
1801	5813594	31岁	-3.7α/αα			145	79	27.2	96.77	3.23
1802	8144976	26岁				142	90.3	32.1	97.67	2.33
1803	3252080	26岁				139	89.4	29.5	97.44	2.56
1804	7324191	37岁	--SEA/αα			127	66.8	20.8	97.74	2.26
1805	5408812	38岁				146	88.7	30	97.17	2.83
1806	6143383	31岁			-29/N	123	64.5	20.1	93.27	5.07
1807	7838880	28岁				111	97.2	31.4	97.44	2.56
1808	8177185	31岁				111	90	30.7	97.03	2.97
1809	8190940	29岁				161	81.6	28.7	97.28	2.72
1810	1540069	34岁				143	91.1	30.2	97.61	2.39
1811	7367953	32岁				142	93.4	31.1	97.51	2.49
1812	7937339	27岁				151	83.3	28.4	97.23	2.77
1813	280539	38岁				89	63.4	18.6	97.73	2.27
1814	5750744	37岁				124	86.9	29.5	97.36	2.64
1815	7915565	29岁			41-42/N	101	60.2	19	94.48	5.52
1816	8175036	24岁			41-42/N	107	62.5	19.3	93.53	5.07
1817	1514822	35岁				127	90.4	29.8	97.39	2.61
1818	645416	40岁				99	72.2	22.2	97.69	2.31
1819	139870	38岁				127	90.3	30	97.07	2.93
1820	7864079	39岁	-4.2α/αα			121	83.5	27.4	97.69	2.31
1821	7367493	25岁				129	92.3	31	97.48	2.52
1822	4217904	34岁				140	87.6	28.9	97.2	2.8
1823	7493568	29岁				146	92.4	29.8	97.53	2.47
1824	7612815	26岁				124	91.6	29.8	97.61	2.39
1825	128975	36岁				132	84.6	28.1	96.96	3.04
1826	6617194	28岁				140	90.2	30.5	97.57	2.43
1827	3961518	33岁	-3.7α/αα			148	79.9	25.6	97.44	2.56
1828	7230783	25岁				114	75.7	25.2	97.63	2.37
1829	6639565	33岁		αCSα/αα		148	85.9	28.1	98.21	1.79
1830	8014800	36岁				169	88.5	29.9	97.63	2.37
1831	6393435	25岁	--SEA/αα			107	65.7	20.5	98	2
1832	4825763	37岁				106	89.6	28.3	97.44	2.56
1833	7938790	37岁				124	96.8	30.1	98.71	1.29
1834	8070978	27岁				118	86.4	27.6	97.66	2.34
1835	7883453	32岁				114	81.5	27.3	97.65	2.35
1836	3104277	34岁				108	62	19.5	91.81	5.82
1837	8125058	28岁				115	84.3	28.6	97.67	2.33
1838	3354322	28岁	-3.7α/αα			121	87.6	28.7	97.7	2.3
1839	4366408	30岁				96	67	20	98.02	1.98
1840	6929330	25岁				130	97.8	27.6	97.75	2.25
1841	7950005	25岁				136	88	29.7	97.24	2.76
1842	4764868	28岁				130	83	28	97.5	2.5
1843	8001806	26岁				133	86.9	29	97.89	2.11
1844	8139111	23岁				117	89.4	28.7	97.53	2.47
1845	8084775	30岁			41-42/N	84	61	20	95.17	4.83
1846	8214763	23岁			17/N	123	62.2	19.3	95.23	4.77
1847	5750452	38岁				136	86.4	29.8	97.21	2.79
1848	637863	28岁	--SEA/αα			138	69.6	22.2	97.52	2.48
1849	410641	34岁				110	82.5	25.1	97.58	2.42
1850	7354934	23岁				107	82.1	26.6	97.07	2.93
1851	7572814	25岁				154	90	31.1	97.6	2.4
1852	5701046	31岁				134	87.7	29.5	97.66	2.34
1853	8049175	34岁				122	91.6	30	96.43	3.57
1854	7916103	26岁				123	80.3	27.5	97.66	2.34
1855	4322432	29岁				130	94.6	30.7	97.89	2.11
1856	3694318	31岁				123	91.3	29.6	97.53	2.47
1857	3803766	41岁				120	100.3	32.3	97.05	2.95
1858	8088417	28岁				113	80.7	24.6	97.81	2.19
1859	8037033	24岁	-3.7α/αα			116	79.5	26.2	97.53	2.47
1860	5520193	32岁	-3.7α/αα			124	89.1	28.6	97.83	2.17
1861	6563234	33岁				137	89.6	29.1	97.57	2.43
1862	8016047	23岁				118	84.8	28	97.09	2.91
1863	6752851	28岁				125	93.5	31	97.56	2.44
1864	1755531	35岁				114	81.5	26	97.7	2.3
1865	7773285	25岁	-4.2α/αα			115	80.7	26.1	97.61	2.39
1866	8179182	49岁				120	81.1	25.5	97.92	2.08
1867	8105160	28岁				115	86.4	29	96.97	3.03
1868	1493644	30岁				150	94.2	31	97.47	2.53
1869	3706365	43岁			-28/N	100	71.1	23.5	93.9	5.14
1870	8220898	25岁			654-2/N	115	63.1	20.1	94.55	5.09
1871	8091020	26岁			17/N	111	59.8	19	92.16	6.35
1872	8197412	28岁	--SEA/αα			147	66.6	21.3	97.42	2.22
1873	5854793	27岁				117	82.3	28	97.72	2.28
1874	7029345	29岁				119	87.3	29.1	97.72	2.28
1875	8168658	31岁				136	89.9	29.2	97.67	2.33
1876	135005	50岁				63	62.5	16.8	98.14	1.86
1877	8226680	31岁				159	88.6	30.7	97.66	2.34
1878	4612068	28岁				122	84.9	26.3	97.54	2.46
1879	646913	53岁	--SEA/αα			88	73.7	22.5	97.95	2.05
1880	4654028	32岁				115	84.4	26.4	97.26	2.74
1881	6253675	30岁				119	88.9	30.6	96.84	3.16
1882	8153810	25岁				114	90.8	31.8	97.26	2.74
1883	4357357	30岁				117	91.4	30.5	97.58	2.42
1884	6221412	34岁				107	100.6	32.4	97.56	2.44
1885	7988541	30岁				121	81.4	28.2	97.33	2.67
1886	6323428	27岁				115	92.5	31	97.55	2.45
1887	3496880	34岁				136	88.5	30.6	97.6	2.4
1888	8260121	40岁				160	84.9	27.7	97.12	2.88
1889	1334457	41岁				146	85.2	28.7	97.4	2.6
1890	4549210	39岁				132	97.5	32.4	97.44	2.56
1891	3659353	39岁			654-2/N	90	59.3	19.2	95.45	4.55
1892	4638446	22岁				135	84.1	26.8	97.64	2.36
1893	5424076	28岁				128	84.7	28	94.57	2.57
1894	6834390	27岁				108	77	24.1	98.2	1.8
1895	8244468	25岁				76	73.7	20.2	98.6	1.4
1896	6041332	37岁				123	87.2	28.1	97.6	2.4
1897	3551755	27岁				130	88.6	30.9	97.83	2.17
1898	4238177	38岁				128	92.1	30.8	97.62	2.38
1899	4058559	35岁				116	78.2	24.5	97.42	2.58
1900	7198214	28岁				130	85.6	28.8	97.67	2.33
1901	7711125	29岁				126	91.1	30.4	97.55	2.45
1902	3433050	31岁				137	83	30.3	94.9	2.73
1903	5398751	31岁				148	86.7	29	97.6	2.4
1904	8222041	24岁				128	87.4	28.3	97.55	2.45
1905	8224962	33岁				137	91.2	28.7	97.52	2.48
1906	4557447	26岁	-4.2α/αα			120	81.5	26.1	97.03	2.92
1907	8176959	36岁				134	87.9	31.2	93.64	2.48
1908	7303478	30岁			17/N	87	59.7	18.8	93.66	5.06
1909	8177290	30岁				117	87.4	30	97.65	2.35
1910	5165333	37岁				136	91.6	31	97.55	2.45
1911	6691199	23岁				118	92	30.3	97.56	2.44
1912	8125058	29岁				115	84.3	28.6	97.67	2.33
1913	8146656	26岁				115	89.2	29	97.55	2.45
1914	6071099	31岁				107	79.6	24.8	97.55	2.45
1915	8252090	31岁				104	76.6	23.6	97.89	2.11
1916	8249465	27岁	--SEA/αα			127	69	21.4	97.55	2.45
1917	8230692	23岁				118	83.3	28.2	97.66	2.34
1918	4600296	30岁	-4.2α/αα			134	78.5	25	97.43	2.57
1919	5894747	43岁				133	89.7	29.8	97.13	2.87
1920	852207	33岁				135	89	31.5	97.56	2.44
1921	8217997	39岁				115	90.4	30.7	97.24	2.76
1922	8238554	33岁				121	90.5	31.1	97.1	2.9
1923	1552090	36岁				109	86.2	29.5	97.24	2.76
1924	7985510	32岁				127	88	29.4	97.67	2.33
1925	650291	48岁	--SEA/αα			96	64.4	19.1	97.02	2.98
1926	8253277	26岁				90	91.7	29.9	97.86	2.14
1927	8149170	26岁				106	71.1	21.4	98.07	1.93
1928	8090970	24岁	--SEA/αα			104	67.1	21.4	97.48	2.52
1929	4411647	29岁				94	78.4	24.8	97.53	2.47
1930	1404957	30岁				126	88.7	29.6	93.81	3.07
1931	5549667	38岁				126	92.2	30.8	97.03	2.97
1932	4592566	33岁			654-2/N	98	63.6	20.9	95.51	4.81
1933	1471929	37岁				77	66	18.3	98.18	1.82
1934	7734453	27岁				133	90.5	30.8	97.63	2.37
1935	1626711	39岁				126	87.2	29.4	95.34	3.71
1936	6042055	28岁			43/N	107	61.9	20	94.13	5.87
1937	4750242	32岁				134	90.6	31.4	97.7	2.3
1938	6306180	33岁				123	83.4	27.6	97.57	2.43
1939	8206156	33岁				155	91.1	30.5	96.38	3.62
1940	651786	41岁			654-2/N	94	81.6	27.1	93.44	5.53
1941	7277332	29岁				107	95.1	30.7	97.24	2.76
1942	7045218	32岁				107	89.3	31	97.62	2.38
1943	188646	38岁				123	88	28.3	97.55	2.45
1944	8222468	29岁				124	92.5	30.2	97.61	2.39
1945	6538522	36岁				140	88.4	29.5	96.49	3.51
1946	8190237	29岁	--SEA/αα			130	78.2	23	97.92	2.08
1947	3169660	32岁	--SEA/αα			106	67.1	20.8	97.64	2.36
1948	4008363	40岁	--SEA/αα			104	66.9	20.8	97.08	2.92
1949	8156945	34岁				122	90.3	29.5	97.53	2.47
1950	5848015	35岁				115	90	29.6	96.25	3.15
1951	6742379	36岁				109	88.6	28.9	97.06	2.94
1952	2714417	35岁	--SEA/αα			105	69.8	21.2	97.53	2.47
1953	8200405	43岁			654-2/N	100	57	16.5	94.34	5.66
1954	6434627	35岁				127	82.3	28.9	96.43	3.57
1955	5250147	35岁				131	92.4	30.3	97.01	2.99
1956	8348407	25岁	--SEA/αα			149	74	22.8	91.03	2.68
1957	181758	44岁				82	95.2	32.5	96.92	3.08
1958	7034651	23岁	--SEA/αα			106	64.9	19.9	97.63	2.37
1959	651486	45岁			41-42/N	82	88.1	28	98.35	6
1960	5141960	32岁				107	93.1	29.5	97.57	2.15
1961	7539843	30岁				122	89.8	30.4	96.33	2.73
1962	8198131	35岁				149	92.6	30	95.94	4.06
1963	652049	49岁			654-2/N	100	61.6	19	94.78	5.22
1964	5324287	24岁				102	79.2	27.9	97.39	2.61
1965	8221150	26岁				125	93.7	31.6	96.4	3.6
1966	6356840	31岁				121	84.9	26.8	97.5	2.5
1967	5106623	31岁			41-42/N	115	61.9	19.2	93.98	6.02
1968	5623693	28岁				112	76.8	23.4	97.47	2.53
1969	8057268	30岁				138	86.7	28.6	97.48	1.92
1970	8351640	36岁				112	96.2	30	95.81	2.9
1971	652979	57岁	--SEA/-α3.7	无扩增产物		86	67.5	18.7	98.98	1.02
1972	8236098	29岁				119	86.9	29.5	96.05	3.95
1973	6066591	27岁				140	93.3	30.2	96.11	3.89
1974	2052665	30岁	-3.7α/αα			119	86.1	27.2	97.47	2.53
1975	5789456	30岁				123	84.8	28.7	97.36	2.64
1976	4050008	35岁				129	92.5	30.3	96.8	3.2
1977	6968653	29岁	-4.2α/αα			110	83	27.2	97.03	2.97
1978	5774919	28岁	-4.2α/αα			142	81.2	25	79.68	1.81
1979	1764814	34岁				115	94.6	31.2	97.05	2.95
1980	7527616	39岁				118	94	30.8	97.39	2.61
1981	7210655	28岁	--SEA/αα			111	69.3	21.3	97.69	2.31
1982	5731954	32岁	-3.7α/αα			156	82.9	26.5	97.62	2.38
1983	7473877	34岁				113	87.8	28.6	98.61	1.39
1984	4243551	38岁				124	94.5	30.9	97.74	2.26
1985	8370331	39岁			654-2/N	129	63.3	20.2	95.33	4.67
1986	8236685	33岁				124	88.7	29.2	97.58	2.42
1987	8253642	42岁			17/N	119	64.9	20.4	94.83	5.17
1988	8362840	24岁				123	90.3	29.9	88.38	2.34
1989	5951261	27岁				131	99.8	32.3	97.72	2.28
1990	4678210	26岁				138	87.4	30.6	97.54	2.46
1991	6117990	30岁	-4.2α/αα			151	91.3	28.3	97.49	2.51
1992	4059306	32岁				124	90.4	31.2	92.45	2.54
1993	7056421	30岁				123	93.8	31.7	97.02	2.98
1994	7036887	30岁			41-42/N	128	66.8	21.2	94.09	5.91
1995	8283092	26岁				177	85.9	30.9	97.23	2.77
1996	7400224	28岁				135	87.6	29.8	97.53	2.47
1997	5802839	33岁				129	91.2	29.9	96.78	3.22
1998	8364434	32岁			-28/N	123	75.6	24	90.47	4.4
1999	654104	50岁				80	76.9	22.3	97.97	2.03
[truncated: 4,724 more rows]
