# Supplementary material
Source: Research Square preprint supplement (doi:10.21203/rs.3.rs-9213369/v1)
Supplement: Supplementary file 3 [file cef590777f20f4d8e261b70b.docx]

**Supplementary Figure legends**

**Figure 1: Diagnostic performance of HbA2 for screening thalassemia subtypes.** Receiver operating characteristic (ROC) curves depicting the sensitivity and specificity of HbA2 levels in differentiating specific genotypes from controls. Panels represent: (A) Silent *α*-thalassemia, (B) Minor *α*-thalassemia, (C) Hb H disease, (D) *β*-thalassemia, and (E) *αβ*-compound thalassemia. AUC values and optimal cut-off criteria are inset in each plot. Note that HbA2 shows high discriminatory power for *β*-globin gene defects (Panels D and E) but limited utility for *α*-thalassemia screening.

**Figure 2: Diagnostic performance of MCV for screening thalassemia subtypes.** ROC curve analysis for Mean Corpuscular Volume (MCV) across five diagnostic groups: Panels represent: (A) Silent *α*-thalassemia, (B) Minor *α*-thalassemia, (C) Hb H disease, (D) *β*-thalassemia, and (E) *αβ*-compound thalassemia. MCV demonstrates high diagnostic accuracy for minor *α*-thalassemia and *β*-thalassemia but lower sensitivity for silent carriers.

**Figure 3: Diagnostic performance of MCH for screening thalassemia subtypes.** ROC curve analysis for Mean Corpuscular Hemoglobin (MCH) across five diagnostic groups (A-E). MCH exhibited the highest AUC (0.954) for the detection of Hb H disease (Panel C), indicating its superior sensitivity for severe *α*-globin defects.
