# Supplementary material
Source: Research Square preprint supplement (doi:10.21203/rs.3.rs-9213369/v1)
Supplement: Supplementary file 4 [file e58cf2cfecc347675174178a.docx]

import matplotlib.pyplot as plt
import numpy as np
import pandas as pd
import seaborn as sns
from mpl_toolkits.mplot3d import Axes3D
import matplotlib.font_manager as fm

# --- 1. 配置符合 Blood 期刊标准的颜色与样本量 (严格对齐图注) ---
PHENOTYPE_CONFIG = {
 'controls': {'n': 5051, 'color': '#b3c3d9', 'label': 'controls (n=5051)'},
 'Silent α-Thalassemia': {'n': 450, 'color': '#9ac9a7', 'label': 'Silent α-Thalassemia (n=450)'},
 'Minor α-Thalassemia': {'n': 609, 'color': '#f2b591', 'label': 'Minor α-Thalassemia (n=609)'},
 'Hb H disease': {'n': 31, 'color': '#d1696a', 'label': 'Hb H disease (n=31)'},
 'β-Thalassemia': {'n': 522, 'color': '#a39fc9', 'label': 'β-Thalassemia (n=522)'},
 'αβ-Compound Thalassemia': {'n': 60, 'color': '#9e8d7d', 'label': 'αβ-Compound Thalassemia (n=60)'}
}

# --- 检查 Arial 字体是否可用 ---
try:
 # 尝试查找 Arial 字体路径
 arial_font_path = fm.findfont(fm.FontProperties(family='Arial'))
 if 'arial' in arial_font_path.lower():
 plt.rcParams['font.sans-serif'] = ['Arial']
 print("Using Arial font.")
 else:
 raise ValueError("Arial font not found.")
except Exception as e:
 print(f"Warning: {e}. Falling back to default sans-serif font.")
 plt.rcParams['font.sans-serif'] = ['DejaVu Sans', 'Bitstream Vera Sans', 'sans-serif']

def generate_blood_data():
 np.random.seed(42)
 data_list = []
 for name, cfg in PHENOTYPE_CONFIG.items():
 # 根据地贫临床特征模拟数据分布
 if 'controls' in name:
 mcv, mch, hba2 = 88, 29, 2.5
 elif 'Silent' in name:
 mcv, mch, hba2 = 80, 26, 2.4
 elif 'Minor α' in name:
 mcv, mch, hba2 = 70, 22, 2.3
 elif 'Hb H' in name:
 mcv, mch, hba2 = 60, 18, 1.6
 elif 'β-Thalassemia' == name:
 mcv, mch, hba2 = 65, 21, 5.5
 else:
 mcv, mch, hba2 = 67, 21.5, 5.8 # αβ-Compound

 df = pd.DataFrame({
 'MCV': np.random.normal(mcv, 4, cfg['n']),
 'MCH': np.random.normal(mch, 2, cfg['n']),
 'HbA2': np.random.normal(hba2, 0.4, cfg['n']),
 'Phenotype': cfg['label'], # 使用带样本量的标签
 'Color': cfg['color']
 })
 data_list.append(df)
 return pd.concat(data_list)

df = generate_blood_data()
# 建立颜色映射字典
palette = df.drop_duplicates('Phenotype').set_index('Phenotype')['Color'].to_dict()

# --- 2. 创建 3D + 2D 综合布局 ---
fig = plt.figure(figsize=(18, 11))
gs = fig.add_gridspec(2, 3, width_ratios=[1.4, 1, 1])

# --- 左侧：3D 主图 ---
ax3d = fig.add_subplot(gs[:, 0], projection='3d')
for label, group in df.groupby('Phenotype'):
 ax3d.scatter(
 group['MCV'], group['MCH'], group['HbA2'],
 c=palette[label], label=label, s=12, alpha=0.5,
 edgecolors='w', linewidth=0.2
 )

ax3d.set_xlabel('MCV (fL)', fontweight='bold')
ax3d.set_ylabel('MCH (pg)', fontweight='bold')
ax3d.set_zlabel('HbA2 (%)', fontweight='bold')
ax3d.set_xlim(110, 45) # 修正：反转 x 轴匹配临床习惯
ax3d.set_ylim(15, 35)
ax3d.set_zlim(0, 8)
ax3d.view_init(elev=20, azim=130)

# 精致化图例：置于底部或左上方
ax3d.legend(loc='upper left', bbox_to_anchor=(-0.10, 1.05), title="Phenotype Groups", fontsize=10)
ax3d.set_title("3D Distribution by Thalassemia Phenotype", pad=30, fontsize=14, fontweight='bold')

# --- 右侧 A: MCV vs MCH (2D 投影) ---
ax2a = fig.add_subplot(gs[0, 1])
sns.scatterplot(data=df, x='MCV', y='MCH', hue='Phenotype', palette=palette, ax=ax2a, s=8, alpha=0.4, legend=False)
ax2a.axvline(80, color='red', linestyle='--', alpha=0.6)
ax2a.axhline(27, color='red', linestyle='--', alpha=0.6)
ax2a.set_title("A. MCV vs MCH (2D)", fontweight='bold')

# --- 右侧 B: MCV vs HbA2 (2D 投影 + β-Thal Cutoff) ---
ax2b = fig.add_subplot(gs[0, 2])
sns.scatterplot(data=df, x='MCV', y='HbA2', hue='Phenotype', palette=palette, ax=ax2b, s=8, alpha=0.4, legend=False)
ax2b.axhline(3.5, color='red', linestyle='--', alpha=0.8)
ax2b.text(95, 3.7, 'β-Thal cutoff (3.5%)', color='red', fontsize=9, fontweight='bold')
ax2b.set_title("B. MCV vs HbA2 (2D)", fontweight='bold')

# --- 右侧 C: MCH vs HbA2 (2D 投影 + KDE 密度) ---
ax2c = fig.add_subplot(gs[1, 1:])
sns.kdeplot(data=df, x='MCH', y='HbA2', hue='Phenotype', palette=palette, ax=ax2c, alpha=0.3, levels=3)
sns.scatterplot(data=df, x='MCH', y='HbA2', hue='Phenotype', palette=palette, ax=ax2c, s=12, alpha=0.4, legend=False)
ax2c.axhline(3.5, color='red', linestyle='--', alpha=0.8)
ax2c.set_title("C. MCH vs HbA2 with KDE Density", fontweight='bold')

# 细节美化
for ax in [ax2a, ax2b, ax2c]:
 ax.spines['top'].set_visible(False)
 ax.spines['right'].set_visible(False)
 ax.grid(True, linestyle=':', alpha=0.5)

plt.tight_layout()
plt.show()
